# Supplementary material for: Modular synthesis of (C-10 to C-13)-substituted-9,14-diaryl-9,14-dihydrodibenzo[a,c]phenazines via a subsequent Buchwald–Hartwig amination and C–H amination strategy
Source: Royal Society of Chemistry journal article supplement (doi:10.1039/c9cc09997b), 2020-01-01

## Electronic Supplementary Information (ESI)

Modular synthesis of substituted-9,14-diaryl-9,14-dihydrodibenzo[a,c]phenazine *via*  
subsequent Buchwald-Hartwig amination and C-H amination strategy

Xiaobin Li<sup>†</sup>, Chengxi Zhang<sup>†</sup>, Chencheng Wang, Wenqiang Ye, Qian Zhang, Zhiyun Zhang, Jianhua  
Su, Yifeng Chen\* and He Tian

*Key Laboratory for Advanced Materials and Joint International Research Laboratory of Precision  
Chemistry and Molecular Engineering, Feringa Nobel Prize Scientist Joint Research Center,  
School of Chemistry and Molecular Engineering, East China University of Science & Technology,  
130 Meilong Road, Shanghai, 200237, China.*

*E-mail: yifengchen@ecust.edu.cn*

# Contents

|                                                                |    |
|----------------------------------------------------------------|----|
| 1. General Experimental Protocols .....                        | 3  |
| 2. General procedure A for the Buchwald-Hartwig Amination..... | 3  |
| 3. General procedure B for the C-H Amination .....             | 7  |
| 4. X-ray Crystallography.....                                  | 14 |
| 5. Reference .....                                             | 16 |
| 6. NMR Data .....                                              | 17 |

## 1. General Experimental Protocols

All reactions were carried out under nitrogen atmosphere and anhydrous conditions unless otherwise indicated. Toluene was distilled from sodium/benzophenone. Dimethyl sulfone was purchased from Adamas [99.8%, SafeDry, with molecular sieves, Water  $\leq$  50 ppm (by K.F.), SafeSeal]. Reactions were monitored by thin-layer chromatography (TLC) carried out on 0.20 mm Huanghai silica gel plates (HSGF 254) using UV light as the visualizing agent. Chromatographic purification of products was accomplished using forced-flow chromatography on silica gel (Huanghai, 300-400 mesh). All new compounds were characterized by means of  $^1\text{H}$ -NMR,  $^{13}\text{C}$ -NMR,  $^{19}\text{F}$ -NMR, and HR-MS. NMR spectra were recorded using a Bruker AVANCE III 400 MHz NMR spectrometer and can be found at the end of the paper. High-resolution mass spectra (HRMS) were recorded on a Waters GCT Premier mass spectrometer using EI-TOF, or JEOL AccuTOF LC-plus 4G using ESI, or Agilent Technologies 7250 GCQTOF using EI. The UV/Vis spectra were recorded on a Nicolet CARY 100 spectrophotometer. The fluorescence spectra were recorded on Horiba Fluoromax 4. Single crystal X-ray diffraction data was collected at 193(2) K for **3f** on a Bruker D8 Venture diffractometer. All  $^1\text{H}$ -NMR data are reported in  $\delta$  units, parts per million (ppm), and were calibrated relative to the signals for residual chloroform (7.26 ppm) in deuteriochloroform ( $\text{CDCl}_3$ ). All  $^{13}\text{C}$ -NMR data are reported in ppm relative to  $\text{CDCl}_3$  (77.16 ppm) and were obtained with  $^1\text{H}$  decoupling. The following abbreviations or combinations thereof were used to explain the multiplicities: s = singlet, bs = broad singlet, d = doublet, t = triplet, q = quartet. *N*<sup>9</sup>,*N*<sup>10</sup>-diphenylphenanthrene-9,10-diamine **1** was prepared followed by the reported procedure.<sup>1</sup>

## 2. General procedure A for the Buchwald-Hartwig Amination

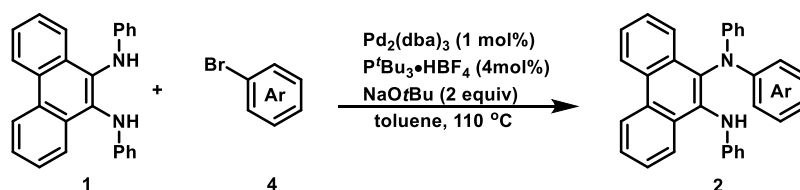

To an oven-dried 10 mL Schlenk tube was added **1** (1.0 equiv), **4** (1.0 equiv),  $\text{Pd}_2\text{dba}_3$  (1 mol%),  $\text{P}^t\text{Bu}_3 \cdot \text{HBF}_4$  (4 mol%), and  $\text{NaOtBu}$  (2.0 equiv). The sealed tube was backfilled with  $\text{N}_2$  (this process was repeated for three times) before toluene (4 mL) was added. The mixture was subsequently heated to  $110\text{ }^\circ\text{C}$  until **1** was consumed completely. After cooling to RT, the mixture was quenched with saturated  $\text{NH}_4\text{Cl}$  solution, diluted and extracted with EtOAc, washed with brine and the organic extracts were then combined and concentrated *in vacuo*. Purification by column chromatography to afford the desired product.

***N*<sup>9</sup>-(4-methoxyphenyl)-*N*<sup>9</sup>,*N*<sup>10</sup>-diphenylphenanthrene-9,10-diamine (2a)**

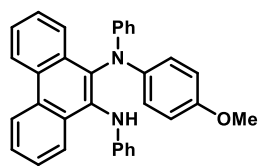

General procedure A was followed on 15 mmol scale with a reaction time of 17 hours and purification by flash column chromatography on silica gel (PE/DCM = 10/1–4/1) to afford **2a** as a yellow-green solid (6.92 g, 99%). M.P. = 45–46 °C; **R<sub>f</sub>** = 0.43 (PE/DCM = 2/1). **<sup>1</sup>H NMR** (400 MHz, CDCl<sub>3</sub>): δ 8.88 (t, *J* = 7.2 Hz, 2H), 8.28 (ddd, *J* = 8.4, 2.4, 1.2 Hz, 2H), 7.77 (td, *J* = 7.6, 0.8 Hz, 1H), 7.70 (td, *J* = 7.6, 1.2 Hz, 1H), 7.66–7.61 (m, 2H), 7.34–7.28 (m, 4H), 7.23–7.19 (m, 4H), 7.00 (t, *J* = 7.2 Hz, 1H), 6.94–6.88 (m, 3H), 6.69 (d, *J* = 7.6, 2H), 6.00 (bs, 1H), 3.80 (s, 3H); **<sup>13</sup>C NMR** (100 MHz, CDCl<sub>3</sub>): δ 155.2, 147.2, 146.1, 139.3, 135.4, 133.5, 131.4, 130.6, 130.4, 129.9, 129.4, 128.8, 127.4, 127.0, 126.7, 126.1, 126.1, 125.1, 123.4, 123.0, 122.9, 120.6, 119.4, 118.6, 115.8, 114.8, 55.3; **HRMS ESI**: (m/z) [M+H]<sup>+</sup>: calcd. for C<sub>33</sub>H<sub>27</sub>N<sub>2</sub>O: 467.2118; found: 467.2124.

***N*<sup>9</sup>,*N*<sup>9</sup>,*N*<sup>10</sup>-triphenylphenanthrene-9,10-diamine (2b)**

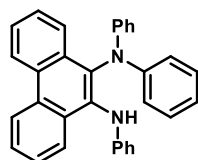

General procedure A was followed on 0.5 mmol scale with a reaction time of 10 hours and purification by flash column chromatography on silica gel (PE to PE/DCM = 10/1) to afford **2b** as a white solid (200.0 mg, 92%). M.P. = 211–212 °C; **R<sub>f</sub>** = 0.54 (PE/EtOAc = 50/1). **<sup>1</sup>H NMR** (400 MHz, CDCl<sub>3</sub>): δ 8.78 (t, *J* = 8.4 Hz, 2H), 8.06 (dd, *J* = 8.0, 0.8 Hz, 1H), 8.02 (dd, *J* = 8.4, 0.8 Hz, 1H), 7.70 (ddd, *J* = 8.4, 7.2, 1.2 Hz, 1H), 7.62 (ddd, *J* = 8.4, 6.8, 1.2 Hz, 1H), 7.52 (qd, *J* = 8.4, 1.2 Hz, 2H), 7.19–7.12 (m, 8H), 7.05 (t, *J* = 7.6 Hz, 2H), 6.90 (ddd, *J* = 8.4, 6.8, 1.6 Hz, 2H), 6.76 (t, *J* = 7.2 Hz, 1H), 6.50 (d, *J* = 8.0, Hz, 2H), 5.86 (bs, 1H); **<sup>13</sup>C NMR** (100 MHz, CDCl<sub>3</sub>): δ 146.5, 146.0, 135.7, 133.3, 131.4, 130.8, 130.4, 129.9, 129.5, 128.8, 127.5, 127.1, 126.8, 126.3, 126.2, 125.1, 123.0, 123.0, 121.9, 120.5, 119.6, 115.9; **HRMS ESI**: (m/z) [M+H]<sup>+</sup>: calcd. for C<sub>32</sub>H<sub>25</sub>N<sub>2</sub>: 437.2012; found: 437.2014.

***N*<sup>9</sup>-(3,4-dimethoxyphenyl)-*N*<sup>9</sup>,*N*<sup>10</sup>-diphenylphenanthrene-9,10-diamine (2c)**

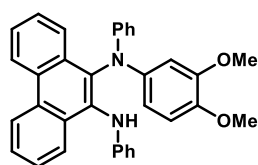

General procedure A was followed on 5 mmol scale with a reaction time of 11 hours and purification by flash column chromatography on silica gel (PE/DCM = 1/1) to afford **2c** as a yellow solid (2.43 g, 98%). M.P. = 105–106 °C; **R<sub>f</sub>** = 0.46 (PE/DCM = 1/1). **<sup>1</sup>H NMR** (400 MHz, CDCl<sub>3</sub>): δ 8.76 (t, *J* = 8.0 Hz, 2H), 8.05 (d, *J* = 8.0 Hz, 2H), 7.68 (t, *J* = 8.0 Hz, 1H), 7.61 (t, *J* = 7.6 Hz, 1H), 7.50 (q, *J* = 7.6 Hz, 2H), 7.16 (t, *J* = 8.0 Hz, 2H), 7.06–6.99 (m, 4H), 6.87 (t, *J* = 7.6 Hz, 1H), 6.77–6.65 (m, 4H), 6.49 (d, *J* = 8.0 Hz, 2H), 5.84 (bs, 1H), 3.79 (s, 3H), 3.57 (s, 3H); **<sup>13</sup>C NMR** (100 MHz, CDCl<sub>3</sub>): δ 149.6, 147.4, 146.3, 145.0, 139.8, 135.4, 133.7, 131.5, 130.7, 130.5, 130.1, 129.6, 128.9, 127.4, 127.1, 126.8, 126.2, 126.2, 125.2, 123.0, 120.8, 119.5, 118.9, 115.6, 114.5, 112.1, 106.8, 56.2, 56.0; **HRMS ESI**: (m/z) [M+H]<sup>+</sup>: calcd. for C<sub>34</sub>H<sub>29</sub>N<sub>2</sub>O<sub>2</sub>: 497.2224; found: 497.2216.

***N*<sup>9</sup>-(4-(diphenylamino)phenyl)-*N*<sup>9</sup>,*N*<sup>10</sup>-diphenylphenanthrene-9,10-diamine (2d)**

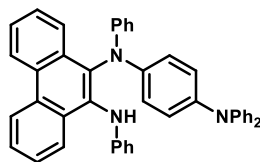

General procedure A was followed on 1 mmol scale with a reaction time of 22 hours and purification by flash column chromatography on silica gel (PE/DCM = 10/1–3/1) to afford **2d** as a yellow solid (412.8 mg, 68%). M.P. = 168–170 °C; **R<sub>f</sub>** = 0.61 (PE/DCM = 3/1). **<sup>1</sup>H NMR** (400 MHz, CDCl<sub>3</sub>): δ 8.81 (t, *J* = 7.2 Hz, 2H), 8.08 (d, *J* = 7.6 Hz, 2H), 7.72 (t, *J* = 7.2 Hz, 1H), 7.66 (t, *J* = 7.2 Hz, 1H), 7.56 (t, *J* = 7.6 Hz, 2H), 7.28–7.21 (m, 6H), 7.15–7.10 (m, 6H), 7.03–7.01 (m, 6H), 6.93–6.86 (m, 4H), 6.56 (d, *J* = 8.0 Hz, 2H), 6.09 (bs, 1H); **<sup>13</sup>C NMR** (100 MHz, CDCl<sub>3</sub>): δ 147.8, 146.6, 145.9, 142.3, 141.6, 135.8, 132.8, 131.3, 130.8, 130.3, 129.6, 129.5, 129.2, 128.8, 127.5, 127.1, 126.7, 126.2, 126.1, 126.0, 125.0, 123.5, 123.0, 123.0, 122.6, 122.3, 121.0, 119.7, 118.9, 116.2; **HRMS ESI** (*m/z*) [*M*]<sup>+</sup>: calcd. for C<sub>44</sub>H<sub>33</sub>N<sub>3</sub>: 603.2669; found: 603.2661.

#### ***N*<sup>9</sup>-(anthracen-2-yl)-*N*<sup>9</sup>,*N*<sup>10</sup>-diphenylphenanthrene-9,10-diamine (2e)**

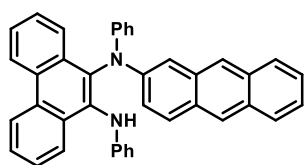

General procedure A was followed on 0.5 mmol scale with a reaction time of 3 hours and purification by flash column chromatography on Al<sub>2</sub>O<sub>3</sub> (PE/DCM = 5/1) to afford **2e** as a yellow solid (208.9 mg, 78%). M.P. = 276–277 °C; **R<sub>f</sub>** = 0.50 (PE/EtOAc = 50/1). **<sup>1</sup>H NMR** (400 MHz, CDCl<sub>3</sub>): δ 8.79 (t, *J* = 9.2 Hz, 2H), 8.25 (s, 1H), 8.04 (d, *J* = 8.4 Hz, 2H), 7.94 (s, 1H), 7.91–7.89 (m, 1H), 7.83 (d, *J* = 9.2 Hz, 1H), 7.80–7.78 (m, 1H), 7.70 (t, *J* = 8.0 Hz, 1H), 7.61 (t, *J* = 7.6 Hz, 1H), 7.52 (t, *J* = 7.6 Hz, 1H), 7.48–7.41 (m, 2H), 7.38–7.34 (m, 3H), 7.20–7.14 (m, 4H), 6.98–6.91 (m, 3H), 6.63 (t, *J* = 7.2 Hz, 1H), 6.46 (d, *J* = 8.0 Hz, 2H); **<sup>13</sup>C NMR** (100 MHz, CDCl<sub>3</sub>): δ 146.3, 146.1, 143.4, 135.8, 133.6, 132.8, 132.3, 131.3, 131.0, 130.8, 130.5, 130.1, 129.7, 129.6, 128.8, 128.7, 128.3, 127.8, 127.7, 127.3, 126.9, 126.4, 126.3, 126.1, 125.6, 125.1, 124.7, 124.4, 123.1, 123.1, 122.4, 122.2, 121.1, 119.6, 115.8, 115.1; **HRMS ESI**: (*m/z*) [*M*+H]<sup>+</sup>: calcd. for C<sub>40</sub>H<sub>29</sub>N<sub>2</sub>: 537.2325; found: 537.2340.

#### ***N*<sup>9</sup>-(6-methoxynaphthalen-2-yl)-*N*<sup>9</sup>,*N*<sup>10</sup>-diphenylphenanthrene-9,10-diamine (2f)**

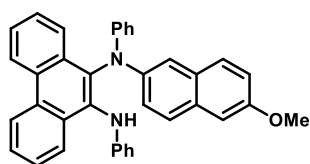

General procedure A was followed on 1 mmol scale with a reaction time of 23 hours and purification by flash column chromatography on silica gel (PE/DCM = 5/1–2/1) to afford **2f** as a yellow solid (425.3 mg, 82%). M.P. = 87–88 °C; **R<sub>f</sub>** = 0.39 (PE/DCM = 2/1). **<sup>1</sup>H NMR** (400 MHz, CDCl<sub>3</sub>): δ 8.82 (t, *J* = 8.4 Hz, 2H), 8.14 (ddd, *J* = 8.0, 4.4, 0.4 Hz, 2H), 7.73 (ddd, *J* = 8.4, 6.8, 1.2 Hz, 1H), 7.66–7.62 (m, 2H), 7.59–7.46 (m, 3H), 7.42–7.39 (m, 2H), 7.24–7.16 (m, 4H), 7.11–7.04 (m, 4H), 6.94 (tt, *J* = 7.2, 1.2 Hz, 1H), 6.76 (t, *J* = 7.2 Hz, 1H), 6.55 (d, *J* = 7.8 Hz, 2H), 5.90 (bs, 1H), 3.91 (s, 3H); **<sup>13</sup>C NMR** (100 MHz, CDCl<sub>3</sub>): δ 156.8, 146.9, 146.1, 142.1, 135.7, 133.7, 131.4, 130.8, 130.7, 130.5, 130.1, 129.9, 129.5, 128.8, 128.4, 128.1, 127.5, 127.1, 126.8, 126.3, 126.2, 125.2, 123.0, 123.0, 122.3, 121.6, 120.1, 119.5, 119.1, 117.6, 115.7; 105.9, 55.4; **HRMS ESI**: (*m/z*) [*M*+H]<sup>+</sup>: calcd. for C<sub>37</sub>H<sub>29</sub>N<sub>2</sub>O: 517.2274; found: 517.2281.

#### ***N*<sup>9</sup>-(benzo[*b*]thiophen-5-yl)-*N*<sup>9</sup>,*N*<sup>10</sup>-diphenylphenanthrene-9,10-diamine (2g)**

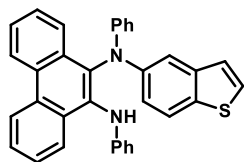

General procedure A was followed on 0.5 mmol scale with a reaction time of 17 hours and purification by flash column chromatography on silica gel (PE/DCM = 10/1–8/1) to afford **2g** as a yellow-green solid (217.2 mg, 88%). M.P. = 98–99 °C; **R<sub>f</sub>** = 0.57 (PE/DCM = 5/1). **<sup>1</sup>H NMR** (400 MHz, CDCl<sub>3</sub>): δ 8.83 (t, *J* = 8.0 Hz, 2H), 8.16 (ddd, *J* = 8.0, 5.6, 0.8 Hz, 2H), 7.76–7.64 (m, 3H), 7.60–7.53 (m, 3H), 7.38–7.33 (m, 2H), 7.25–7.19 (m, 4H), 7.09–7.05 (m, 3H), 6.98–6.94 (m, 1H), 6.78 (t, *J* = 7.8 Hz, 1H), 6.56 (d, *J* = 7.6 Hz, 2H), 5.95 (bs, 1H); **<sup>13</sup>C NMR** (100 MHz, CDCl<sub>3</sub>): δ 147.0, 146.1, 143.6, 140.9, 135.7, 133.8, 133.7, 131.4, 130.8, 130.5, 130.1, 129.5, 128.8, 127.6, 127.4, 127.1, 126.8, 126.2, 125.2, 123.6, 123.3, 123.0, 123.0, 121.6, 120.0, 119.5, 119.3, 115.7, 115.5; **HRMS ESI**: (m/z) [M+H]<sup>+</sup>: calcd. for C<sub>34</sub>H<sub>25</sub>N<sub>2</sub>S: 493.1733; found: 493.1720.

#### *N*<sup>9</sup>-(6-methoxypyridin-3-yl)-*N*<sup>9</sup>,*N*<sup>10</sup>-diphenylphenanthrene-9,10-diamine (**2h**)

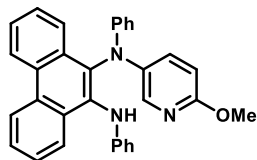

General procedure A was followed on 7 mmol scale with a reaction time of 4 hours and purification by flash column chromatography on silica gel (PE/DCM = 3/1–DCM) to afford **2h** as a yellow solid (3.44 g, 99%). M.P. = 74–75 °C; **R<sub>f</sub>** = 0.69 (PE/acetone = 10/1). **<sup>1</sup>H NMR** (400 MHz, CDCl<sub>3</sub>): δ 8.76 (dd, *J* = 8.4, 4.4 Hz, 2H), 8.03 (dd, *J* = 8.0, 0.8 Hz, 1H), 7.98–7.96 (m, 2H), 7.68 (ddd, *J* = 8.4, 7.2, 1.2 Hz, 1H), 7.62 (ddd, *J* = 8.0, 6.8, 0.8 Hz, 1H), 7.53–7.48 (m, 2H), 7.40 (dd, *J* = 8.8, 2.8 Hz, 1H), 7.20–7.16 (m, 2H), 7.05–6.97 (m, 4H), 6.89 (t, *J* = 7.6 Hz, 1H), 6.74 (t, *J* = 7.2 Hz, 1H), 6.49 (d, *J* = 8.8 Hz, 1H), 6.45 (d, *J* = 7.6 Hz, 2H), 5.81 (s, 1H), 3.81 (s, 3H); **<sup>13</sup>C NMR** (100 MHz, CDCl<sub>3</sub>): δ 159.8, 146.8, 145.9, 140.7, 136.8, 135.6, 133.5, 133.0, 131.0, 130.9, 130.5, 129.9, 129.8, 129.0, 127.6, 127.3, 126.9, 126.4, 126.2, 124.9, 123.2, 123.0, 121.2, 119.6, 118.2, 115.7, 111.1, 53.6; **HRMS ESI**: (m/z) [M+H]<sup>+</sup>: calcd. for C<sub>32</sub>H<sub>26</sub>N<sub>3</sub>O: 468.2070; found: 468.2067.

#### *N*<sup>9</sup>,*N*<sup>10</sup>-diphenyl-*N*<sup>9</sup>-(1-phenyl-1H-indol-6-yl)phenanthrene-9,10-diamine (**2i**)

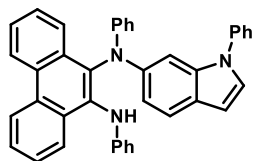

General procedure A was followed on 0.5 mmol scale with a reaction time of 24 hours and purification by flash column chromatography on silica gel (PE/DCM = 10/1) to afford **2i** as a yellow-green solid (221.4 mg, 80%). M.P. = 120–121 °C; **R<sub>f</sub>** = 0.38 (PE/EtOAc = 60/1). **<sup>1</sup>H NMR** (400 MHz, CDCl<sub>3</sub>): δ 8.76 (t, *J* = 8.8 Hz, 2H), 8.07 (d, *J* = 8.0 Hz, 1H), 8.01 (d, *J* = 8.4 Hz, 1H), 7.67 (ddd, *J* = 8.4, 7.2, 1.6 Hz, 1H), 7.59 (ddd, *J* = 8.0, 7.2, 1.2 Hz, 1H), 7.52–7.44 (m, 3H), 7.38–7.32 (m, 3H), 7.27–7.24 (m, 3H), 7.21 (d, *J* = 3.2 Hz, 1H), 7.15 (t, *J* = 7.2 Hz, 2H), 7.07 (td, *J* = 8.4, 1.6, 3H), 6.95 (t, *J* = 7.2 Hz, 2H), 6.86 (t, *J* = 7.2 Hz, 1H), 6.68 (t, *J* = 7.2 Hz, 1H), 6.58 (d, *J* = 3.2 Hz, 1H), 6.43 (d, *J* = 8.4 Hz, 2H), 5.85 (bs, 1H); **<sup>13</sup>C NMR** (100 MHz, CDCl<sub>3</sub>): δ 147.7, 146.3, 142.1, 139.7, 136.5, 135.4, 134.0, 131.6, 130.8, 130.5, 130.2, 129.7, 129.5, 128.8, 127.9, 127.4, 126.9, 126.7, 126.3, 126.2, 126.1, 125.4, 125.3, 124.0, 123.0, 123.0, 121.9, 121.0, 119.5, 119.3, 116.5, 115.7, 104.1, 103.6; **HRMS ESI**: (m/z) [M+H]<sup>+</sup>: calcd. for C<sub>40</sub>H<sub>30</sub>N<sub>3</sub>: 552.2434; found: 552.2420.

### *N*<sup>9</sup>,*N*<sup>10</sup>-diphenyl-*N*<sup>9</sup>-(pyridin-3-yl)phenanthrene-9,10-diamine (**2j**)

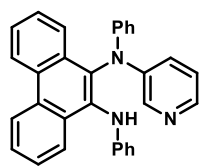

General procedure A was followed on 0.2 mmol scale with a reaction time of 2 hours and purification by flash column chromatography on silica gel (PE/EtOAc = 5/1) with 2% Et<sub>3</sub>N to afford **2j** as a brown-yellow solid (76 mg, 87%). M.P. = 179–181 °C; *R*<sub>f</sub> = 0.36 (PE/EtOAc = 2/1). <sup>1</sup>H NMR (400 MHz, CDCl<sub>3</sub>): δ 8.77 (dd, *J* = 8.4, 4.4 Hz, 2H), 8.45 (d, *J* = 2.0 Hz, 1H), 8.07–8.03 (m, 2H), 7.94 (d, *J* = 8.0 Hz, 1H), 7.70 (ddd, *J* = 8.4, 7.2, 1.2 Hz, 1H), 7.63 (ddd, *J* = 8.0, 6.8, 1.2 Hz, 1H), 7.54–7.48 (m, 2H), 7.29–7.26 (m, 1H), 7.24–7.13 (m, 4H), 7.04–6.95 (m, 4H), 6.73 (t, *J* = 7.6 Hz, 1H), 6.46 (d, *J* = 8.4 Hz, 2H), 5.80 (s, 1H); <sup>13</sup>C NMR (100 MHz, CDCl<sub>3</sub>): δ 145.7, 145.5, 143.0, 142.5, 142.1, 136.0, 132.4, 131.0, 130.7, 130.5, 129.9, 129.8, 129.0, 127.7, 127.5, 127.0, 126.7, 126.5, 126.3, 124.7, 123.8, 123.2, 123.1, 122.9, 120.5, 119.8, 115.7; HRMS ESI: (*m/z*) [M+H]<sup>+</sup>: calcd. for C<sub>31</sub>H<sub>24</sub>N<sub>3</sub>: 438.1965; found: 438.1966.

### *N*<sup>9</sup>,*N*<sup>10</sup>-diphenyl-*N*<sup>9</sup>-(quinolin-3-yl)phenanthrene-9,10-diamine (**2k**)

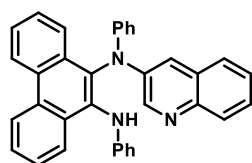

General procedure A was followed on 0.5 mmol scale with a reaction time of 6 hours and purification by flash column chromatography on silica gel (PE/EtOAc = 10/1) to afford **2k** as a brown-red solid (212.2 mg, 87%). M.P. = 113–115 °C; *R*<sub>f</sub> = 0.47 (PE/EtOAc = 5/2). <sup>1</sup>H NMR (400 MHz, CDCl<sub>3</sub>): δ 8.93 (d, *J* = 2.0 Hz, 1H), 8.80 (t, *J* = 7.6 Hz, 2H), 8.09 (d, *J* = 8.0 Hz, 1H), 8.02 (d, *J* = 8.0 Hz, 1H), 7.97 (d, *J* = 8.4 Hz, 1H), 7.72 (t, *J* = 7.6 Hz, 1H), 7.63 (t, *J* = 7.6 Hz, 1H), 7.54 (t, *J* = 7.6 Hz, 1H), 7.52–7.47 (m, 3H), 7.36 (d, *J* = 4.0 Hz, 2H), 7.25–7.16 (m, 4H), 7.03–6.95 (m, 3H), 6.65 (t, *J* = 7.2 Hz, 1H), 6.46 (d, *J* = 8.0 Hz, 2H), 5.80 (s, 1H); <sup>13</sup>C NMR (100 MHz, CDCl<sub>3</sub>): δ 145.9, 145.8, 145.7, 143.6, 140.1, 136.0, 132.8, 131.0, 130.7, 130.6, 130.0, 130.0, 128.9, 128.8, 127.8, 127.6, 127.4, 127.1, 127.1, 126.7, 126.6, 126.3, 124.7, 123.2, 123.1, 120.4, 119.7, 115.5; HRMS ESI: (*m/z*) [M+H]<sup>+</sup>: calcd. for C<sub>35</sub>H<sub>26</sub>N<sub>3</sub>: 488.2121; found: 488.2129.

## 3. General procedure B for the C-H Amination

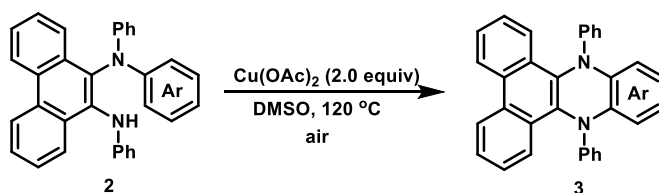

To an 8 mL vial equipped with a stir bar was added **2** (1.0 equiv) and Cu(OAc)<sub>2</sub> (2.0 equiv) dissolved in DMSO (using CaCl<sub>2</sub> drying tube as a desiccator) under air. The mixture was subsequently heated to 120 °C and monitored by TLC until **2** was completely consumed. After cooling to RT, the mixture was quenched with water and filtered. The filtrate was diluted and extracted with EtOAc, washed with brine and the organic extracts were then combined and concentrated *in vacuo*. Purification by column chromatography yielded the desired product.

## Characterization Data for products

### 11-methoxy-9,14-diphenyl-9,14-dihydrodibenzo[a,c]phenazine (3a)

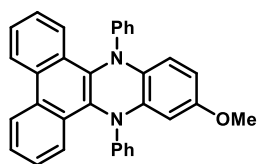

General procedure B was followed on 0.2 mmol scale with a reaction time of 12 hours and purification by flash column chromatography on silica gel (PE/DCM = 5/1–4/1) to afford **3a** as a chartreuse solid (53.7 mg, 58%). M.P. = 219–220 °C; **R<sub>f</sub>** = 0.53 (PE/DCM = 2/1). **<sup>1</sup>H NMR** (400 MHz, CDCl<sub>3</sub>): δ 8.76 (d, *J* = 8.4 Hz, 2H), 8.19 (dd, *J* = 14.4, 7.6 Hz, 2H), 7.69–7.64 (m, 3H), 7.61–7.55 (m, 2H), 7.37 (bs, 1H), 7.10–7.03 (m, 6H), 6.98–6.92 (m, 3H), 6.84–6.78 (m, 2H), 3.92 (s, 3H); **<sup>13</sup>C NMR** (100 MHz, CDCl<sub>3</sub>): δ 157.5, 148.4, 147.5, 146.1, 138.7, 138.4, 137.9, 129.9, 129.9, 129.7, 129.5, 128.8, 128.7, 128.1, 127.1, 127.0, 126.6, 126.6, 124.7, 124.7, 123.1, 123.1, 121.3, 120.7, 117.2, 116.3, 113.1, 110.6, 55.9; **HRMS EI**: calcd. for C<sub>33</sub>H<sub>24</sub>N<sub>2</sub>O: 464.1883; found: 464.1886.

### 9,14-diphenyl-9,14-dihydrodibenzo[a,c]phenazine (3b)

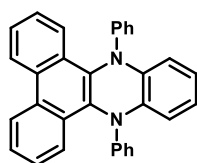

General procedure B was followed on 0.1 mmol scale with a reaction time of 13 hours and purification by flash column chromatography on silica gel (PE/DCM = 10/1) to afford **3b** as a white solid (16.7 mg, 38%). **R<sub>f</sub>** = 0.61 (PE/EtOAc = 30/1). **<sup>1</sup>H NMR** (400 MHz, CDCl<sub>3</sub>): δ 8.74 (d, *J* = 8.4 Hz, 2H), 8.14 (d, *J* = 8.0 Hz, 2H), 7.76 (dd, *J* = 5.6, 3.6 Hz, 2H), 7.65 (t, *J* = 7.2 Hz, 2H), 7.55 (t, *J* = 7.6 Hz, 2H), 7.35 (dd, *J* = 5.2, 3.6 Hz, 2H), 7.05–6.95 (m, 8H), 6.78 (t, *J* = 6.8 Hz, 2H); **<sup>13</sup>C NMR** (100 MHz, CDCl<sub>3</sub>): δ 147.8, 145.0, 138.3, 130.0, 129.6, 128.9, 127.5, 127.1, 126.6, 125.5, 124.7, 123.1, 121.1, 116.9. This product is matched with reported data.<sup>2</sup>

### 11,12-dimethoxy-9,14-diphenyl-9,14-dihydrodibenzo[a,c]phenazine (3c)

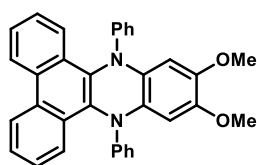

General procedure B was followed on 1.165 mmol scale with a reaction time of 12 hours and purification by flash column chromatography on silica gel (PE/DCM = 5/1–2/1) to afford **3c** as a yellow solid (479.1 mg, 83%). M.P. = 174–175 °C; **R<sub>f</sub>** = 0.46 (PE/EtOAc = 10/3). **<sup>1</sup>H NMR** (400 MHz, CDCl<sub>3</sub>): δ 8.76 (d, *J* = 8.0 Hz, 2H), 8.21 (d, *J* = 8.0 Hz, 2H), 7.67 (t, *J* = 7.2 Hz, 2H), 7.59 (t, *J* = 7.6 Hz, 2H), 7.32 (s, 2H), 7.05–6.95 (m, 8H), 6.78 (t, *J* = 7.2 Hz, 2H), 4.02 (s, 6H); **<sup>13</sup>C NMR** (100 MHz, CDCl<sub>3</sub>): δ 148.2, 146.8, 139.1, 138.0, 129.8, 129.7, 128.7, 127.1, 126.6, 124.7, 123.1, 120.8, 116.3, 111.0, 56.5; **HRMS EI**: calcd. for C<sub>34</sub>H<sub>26</sub>N<sub>2</sub>O<sub>2</sub>: 494.1989; found: 494.1997.

### N,N,9,14-tetraphenyl-9,14-dihydrodibenzo[a,c]phenazin-11-amine (3d)

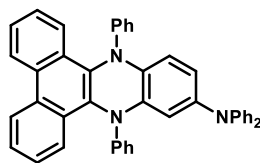

General procedure B was followed on 0.5 mmol scale with a reaction time of 6 hours and purification by flash column chromatography on silica gel (PE/DCM = 20/1–2/1) to afford **3d** as a yellow solid (93.3 mg, 31%). M.P. = 277–278 °C; **R<sub>f</sub>** = 0.51 (PE/EtOAc = 35/1). **<sup>1</sup>H NMR** (400 MHz, CDCl<sub>3</sub>): δ 8.75 (d, *J* = 8.4 Hz, 2H), 8.13 (d, *J* = 8.0 Hz, 1H), 8.01 (d, *J* = 8.0 Hz, 1H), 7.68–7.48 (m, 6H),



7.34–7.30 (m, 4H), 7.23–7.21 (m, 4H), 7.10–7.00 (m, 9H), 6.89 (d,  $J = 8.0$  Hz, 2H), 6.84–6.78 (m, 2H);  $^{13}\text{C}$  NMR (100 MHz,  $\text{CDCl}_3$ ):  $\delta$  148.0, 147.8, 147.5, 145.7, 145.5, 139.7, 138.4, 137.9, 130.0, 130.0, 129.5, 129.5, 128.9, 128.8, 127.6, 127.1, 127.0, 126.6, 126.6, 124.7, 124.4, 123.1, 123.1, 123.0, 121.1, 121.0, 120.8, 117.0, 116.6; **HRMS ESI**: ( $m/z$ ) [ $M$ ] $^+$ : calcd. for  $\text{C}_{44}\text{H}_{31}\text{N}_3$ : 601.2513; found: 603.2501.

### 5,14-diphenyl-5,14-dihydrodibenzo[a,c]naphtho[2,3-h]phenazine (3e)

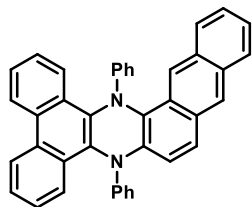

General procedure B was followed on 0.056 mmol scale with a reaction time of 10 hours and purification by flash column chromatography on  $\text{Al}_2\text{O}_3$  (PE–PE/EtOAc = 50/1) to afford **3e** as a yellow-green solid (27.1 mg, 91%). M.P. = 199–201 °C;  $R_f$  = 0.37 (PE/EtOAc = 50/1).  $^1\text{H}$  NMR (400 MHz,  $\text{CDCl}_3$ ):  $\delta$  8.97 (s, 1H), 8.75 (d,  $J = 8.0$  Hz, 2H), 8.70 (d,  $J = 8.0$  Hz, 1H), 8.51 (s, 1H), 8.19 (d,  $J = 8.0$  Hz, 1H), 8.10 (d,  $J = 7.6$  Hz, 1H), 8.05–7.96 (m, 3H), 7.79–7.70 (m, 2H), 7.65 (t,  $J = 7.6$  Hz, 1H), 7.55 (t,  $J = 8.0$  Hz, 1H), 7.51–7.47 (m, 2H), 7.11 (d,  $J = 8.0$  Hz, 2H), 7.06 (t,  $J = 7.2$  Hz, 2H), 6.91 (t,  $J = 7.6$  Hz, 2H), 6.85 (t,  $J = 7.2$  Hz, 1H), 6.71 (t,  $J = 7.2$  Hz, 1H), 6.66 (d,  $J = 8.4$  Hz, 2H);  $^{13}\text{C}$  NMR (100 MHz,  $\text{CDCl}_3$ ):  $\delta$  149.6, 147.1, 143.6, 139.9, 139.1, 138.8, 132.4, 131.6, 130.7, 130.3, 130.2, 130.0, 129.7, 129.5, 129.0, 128.7, 128.6, 128.3, 127.5, 127.2, 127.1, 126.9, 126.7, 126.1, 125.6, 125.6, 125.0, 124.6, 123.2, 123.1, 122.1, 122.1, 120.0, 118.8, 115.6; **HRMS ESI**: ( $m/z$ ) [ $M+H$ ] $^+$ : calcd. for  $\text{C}_{40}\text{H}_{27}\text{N}_2$ : 535.2169; found: 535.2167.

### 3-methoxy-7,16-diphenyl-7,16-dihydrotribenzo[a,c,h]phenazine (3f)

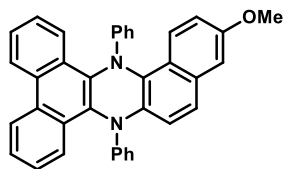

General procedure B was followed on 0.5 mmol scale with a reaction time of 14 hours and purification by flash column chromatography on silica gel (PE/DCM = 5/1–3/1) to afford **3f** as a white solid (182.0 mg, 71%). M.P. = 273–274 °C;  $R_f$  = 0.55 (PE/DCM = 5/1).  $^1\text{H}$  NMR (400 MHz,  $\text{CDCl}_3$ ):  $\delta$  8.73 (d,  $J = 8.4$  Hz, 2H), 8.56 (dd,  $J = 6.4, 2.0$  Hz, 2H), 8.41 (d,  $J = 8.8$  Hz, 1H), 8.23 (d,  $J = 8.0$  Hz, 1H), 8.00 (d,  $J = 8.8$  Hz, 1H), 7.81 (d,  $J = 8.8$  Hz, 1H), 7.73–7.69 (m, 2H), 7.65 (t,  $J = 8.0$  Hz, 1H), 7.57 (t,  $J = 8.0$  Hz, 1H), 7.35 (dd,  $J = 9.2, 2.4$  Hz, 1H), 7.27 (d,  $J = 2.4$  Hz, 1H), 7.11–7.03 (m, 4H), 6.96 (t,  $J = 7.6$  Hz, 2H), 6.83 (t,  $J = 6.8$  Hz, 1H), 6.73 (t,  $J = 7.2$  Hz, 1H), 6.67 (d,  $J = 8.4$  Hz, 2H), 3.98 (s, 3H);  $^{13}\text{C}$  NMR (100 MHz,  $\text{CDCl}_3$ ):  $\delta$  157.8, 149.0, 147.4, 142.0, 140.1, 139.9, 139.3, 133.0, 130.6, 130.0, 129.6, 129.5, 128.8, 128.5, 127.4, 127.0, 126.9, 126.7, 126.6, 126.4, 125.4, 125.2, 124.9, 124.5, 123.1, 123.1, 121.5, 119.9, 119.8, 117.7, 115.3, 106.2, 55.5; **HRMS ESI**: ( $m/z$ ) [ $M+H$ ] $^+$ : calcd. for  $\text{C}_{37}\text{H}_{27}\text{N}_2\text{O}$ : 515.2118; found: 515.2108.

### 6,15-diphenyl-6,15-dihydrodibenzo[a,c]thieno[3,2-h]phenazine (3g)

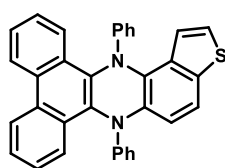

General procedure B was followed on 0.2 mmol scale with a reaction time of 14 hours and purification by flash column chromatography on silica gel (PE/ EtOAc = 50/1) to afford **3g** as a white solid (43.3 mg, 44%). M.P. = 131–132 °C;  $R_f$  = 0.43 (PE/EtOAc = 50/1).  $^1\text{H}$  NMR (400 MHz,  $\text{CDCl}_3$ ):  $\delta$  8.75 (d,  $J =$

8.0 Hz, 2H), 8.37 (dd,  $J = 7.6, 1.2$  Hz, 1H), 8.18 (d,  $J = 8.4$  Hz, 1H), 7.88 (d,  $J = 8.4$  Hz, 1H), 7.82 (d,  $J = 8.8$  Hz, 1H), 7.71–7.63 (m, 4H), 7.58–7.54 (m, 2H), 7.01–7.00 (m, 4H), 6.95 (t,  $J = 8.0$  Hz, 2H), 6.79–6.75 (m, 1H), 6.72–6.68 (m, 3H);  $^{13}\text{C}$  NMR (100 MHz,  $\text{CDCl}_3$ ):  $\delta$  148.1, 147.7, 142.8, 139.9, 139.6, 139.1, 138.7, 137.6, 130.3, 130.1, 129.8, 129.7, 128.8, 128.7, 128.2, 127.3, 127.1, 126.8, 126.8, 124.9, 124.7, 124.3, 123.2, 123.2, 122.3, 121.2, 120.1, 120.0, 117.1, 115.0; **HRMS ESI**: ( $m/z$ )  $[\text{M}+\text{H}]^+$ : calcd. for  $\text{C}_{34}\text{H}_{23}\text{N}_2\text{S}$ : 491.1577; found: 491.1583.

### 11-methoxy-9,14-diphenyl-9,14-dihydrodibenzo[f,h]pyrido[2,3-b]quinoxaline(3h)

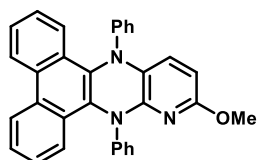

General procedure B was followed on 1.3 mmol scale with a reaction time of 8 hours and purification by flash column chromatography on silica gel (PE/ DCM = 5/1) to afford **3h** as a white solid (545.1 mg, 90%). M.P. = 234–236 °C;  $R_f$  = 0.66 (PE/acetone = 10/1).  $^1\text{H}$  NMR (400 MHz,  $\text{CDCl}_3$ ):  $\delta$  8.71 (d,  $J = 8.0$  Hz, 2H), 8.14 (d,  $J = 8.0$  Hz, 1H), 7.81 (t,  $J = 8.4$  Hz, 2H), 7.71 (d,  $J = 8.0$  Hz, 2H), 7.64 (t,  $J = 7.2$  Hz, 1H), 7.56 (t,  $J = 7.6$  Hz, 2H), 7.36 (t,  $J = 7.6$  Hz, 1H), 7.20 (t,  $J = 7.2$  Hz, 2H), 7.10–7.02 (m, 3H), 6.93 (d,  $J = 8.0$  Hz, 2H), 6.84 (t,  $J = 7.2$  Hz, 1H), 6.64 (d,  $J = 8.4$  Hz, 1H), 4.08 (s, 3H);  $^{13}\text{C}$  NMR (100 MHz,  $\text{CDCl}_3$ ):  $\delta$  160.7, 154.6, 149.6, 145.7, 138.0, 136.0, 134.8, 130.8, 129.8, 129.3, 129.2, 129.0, 128.9, 128.1, 127.8, 127.3, 126.6, 126.4, 125.2, 124.5, 124.0, 123.2, 123.1, 123.0, 121.3, 116.5, 150.2, 54.2; **HRMS ESI**: ( $m/z$ )  $[\text{M}+\text{H}]^+$ : calcd. for  $\text{C}_{32}\text{H}_{24}\text{N}_3\text{O}$ : 466.1914; found: 466.1907.

### 1,6,15-triphenyl-6,15-dihydro-1H-dibenzo[a,c]pyrrolo[2,3-h]phenazine (3i)

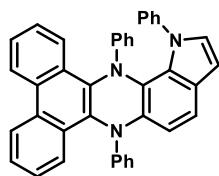

General procedure B was followed on 0.2 mmol scale with a reaction time of 20 hours and purification by flash column chromatography on silica gel (PE/EtOAc = 100/1–50/1) to afford **3i** as a yellow-green solid (77.2 mg, 70%). M.P. = 115–117 °C;  $R_f$  = 0.51 (PE/EtOAc = 50/1).  $^1\text{H}$  NMR (400 MHz,  $\text{CDCl}_3$ ):  $\delta$  8.70 (t,  $J = 9.2$  Hz, 2H), 8.19 (d,  $J = 8.0$  Hz, 1H), 7.71–7.60 (m, 4H), 7.54 (t,  $J = 8.0$  Hz, 1H), 7.49–7.43 (m, 1H), 7.34 (t,  $J = 7.6$  Hz, 1H), 7.29–7.26 (m, 4H), 7.15 (d,  $J = 3.2$  Hz, 1H), 6.90–6.85 (m, 5H), 6.79 (t,  $J = 8.0$  Hz, 2H), 6.74 (d,  $J = 3.2$  Hz, 1H), 6.71–6.66 (m, 1H), 6.58 (t,  $J = 7.2$  Hz, 1H), 6.42 (d,  $J = 8.0$  Hz, 2H);  $^{13}\text{C}$  NMR (100 MHz,  $\text{CDCl}_3$ ):  $\delta$  149.4, 148.0, 142.3, 140.8, 140.8, 140.6, 133.6, 132.3, 130.7, 130.4, 129.9, 129.8, 129.4, 128.9, 128.8, 128.5, 128.0, 127.8, 127.7, 127.0, 126.7, 126.6, 126.4, 125.9, 125.0, 123.1, 122.6, 120.7, 120.4, 119.9, 118.6, 117.0, 115.8, 103.6; **HRMS ESI**: ( $m/z$ )  $[\text{M}+\text{H}]^+$ : calcd. for  $\text{C}_{40}\text{H}_{28}\text{N}_3$ : 550.2278; found: 550.2267.

### 9,14-diphenyl-9,14-dihydrodibenzo[f,h]pyrido[2,3-b]quinoxaline (3j)

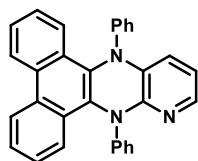

General procedure B was followed on 0.2 mmol scale with a reaction time of 10 hours and purification by flash column chromatography on  $\text{Al}_2\text{O}_3$  gel (PE–PE/EtOAc = 50/1) to afford **3j** as a brown solid (25.9 mg, 30%). M.P. = 270–271 °C;  $R_f$  = 0.46 (PE/EtOAc = 50/1).  $^1\text{H}$  NMR (400 MHz,  $\text{CDCl}_3$ ):  $\delta$  8.71 (dd,  $J = 8.4, 4.0$  Hz, 2H), 8.37 (dd,  $J = 4.8, 1.6$  Hz, 1H), 8.10 (d,  $J = 8.0$  Hz, 1H), 7.94 (dd,  $J = 7.6, 1.6$  Hz, 1H), 7.88 (d,  $J =$

8.4, 1H), 7.73 (d,  $J = 8.0$ , 2H), 7.63 (ddd,  $J = 8.0$ , 6.8, 1.2 Hz, 1H), 7.60–7.53 (m, 2H), 7.39 (ddd,  $J = 8.0$ , 6.8, 0.8 Hz, 1H), 7.23–7.18 (m, 3H), 7.14–7.10 (m, 2H), 7.06–7.00 (m, 3H), 6.90 (t,  $J = 7.2$ , 1H);  $^{13}\text{C}$  NMR (100 MHz,  $\text{CDCl}_3$ ):  $\delta$  157.2, 148.3, 145.7, 144.4, 135.9, 135.7, 134.5, 134.5, 130.6, 130.0, 129.2, 129.0, 128.9, 128.2, 127.2, 126.8, 126.6, 126.5, 125.3, 124.4, 123.7, 123.1, 123.1, 122.0, 122.0, 119.5, 117.2; **HRMS ESI**: ( $m/z$ )  $[\text{M}+\text{H}]^+$ : calcd. for  $\text{C}_{31}\text{H}_{22}\text{N}_3$ : 436.1808; found: 436.1805.

### 7,16-diphenyl-7,16-dihydrodibenzo[f,h]quinolino[3,4-b]quinoxaline (3k)

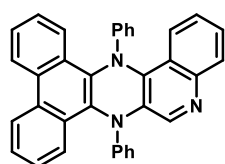

General procedure B was followed on 0.2 mmol scale with a reaction time of 4 hours and purification by flash column chromatography on silica gel (PE/EtOAc = 50/1–10/1) to afford **3k** as a brown solid (81.5 mg, 84%). M.P. = 160–161 °C;  $R_f$  = 0.44 (PE/EtOAc = 5/1).  $^1\text{H}$  NMR (400 MHz,  $\text{CDCl}_3$ ):  $\delta$  9.49 (s, 1H), 8.76–8.73 (m, 2H), 8.49–8.46 (m, 1H), 8.41 (d,  $J = 8.4$  Hz, 1H), 8.24 (d,  $J = 8.4$  Hz, 1H), 8.14 (d,  $J = 8.0$  Hz, 1H), 7.75 (ddd,  $J = 8.0$ , 6.4, 0.8 Hz, 1H), 7.72–7.63 (m, 4H), 7.54 (t,  $J = 7.6$  Hz, 1H), 7.13–7.05 (m, 4H), 6.96 (t,  $J = 8.0$  Hz, 2H), 6.89 (t,  $J = 6.8$  Hz, 1H), 6.76 (t,  $J = 7.2$  Hz, 1H), 6.65 (d,  $J = 8.0$  Hz, 2H);  $^{13}\text{C}$  NMR (100 MHz,  $\text{CDCl}_3$ ):  $\delta$  149.4, 147.9, 147.4, 146.9, 146.5, 140.4, 139.3, 137.7, 130.3, 130.2, 129.9, 129.7, 129.3, 129.3, 129.1, 128.8, 127.6, 127.6, 127.2, 127.1, 127.0, 126.7, 124.8, 124.4, 123.7, 123.2, 123.2, 123.0, 120.8, 119.2, 115.4; **HRMS ESI**: ( $m/z$ )  $[\text{M}+\text{H}]^+$ : calcd. for  $\text{C}_{35}\text{H}_{24}\text{N}_3$ : 486.1965; found: 486.1964.

### 11-methoxy-9,14-diphenyl-9,14-dihydrodibenzo[a,c]phenazine (5)

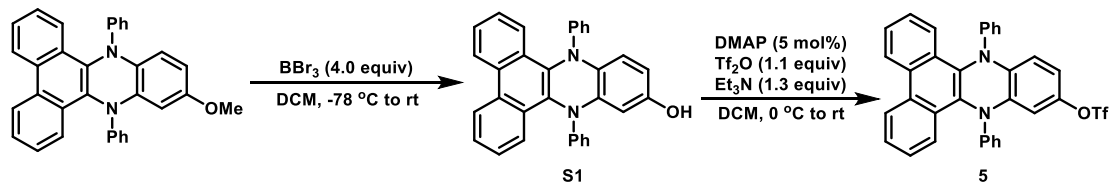

To a round-bottomed flask with 11-methoxy-9,14-diphenyl-9,14-dihydrodibenzo[a,c]phenazine **3a** (3.81 mmol, 1.77 g) in DCM (30 mL) was added  $\text{BBr}_3$  (15.2 mmol, 1.45 mL) at  $-78$  °C, the reaction mixture was allowed to slowly warm to  $25$  °C and then stirred for 3 h. The reaction mixture was quenched with water, the aqueous layer was extracted three times with DCM and separated organic layer was washed with brine, dried over  $\text{Na}_2\text{SO}_4$  and concentrated under reduced pressure. The crude product was purified by column chromatography (silica gel, PE/DCM = 2/1 to 100% DCM) to afford the product **S1** as a white solid (1.66 g, 97%).

To a round-bottomed flask with **S1** (5.8 mmol, 2.55 g), DMAP (0.29 mmol, 35.4 mg) in DCM (25 mL) was added  $\text{Et}_3\text{N}$  (7.54 mmol, 1.10 mL) and  $\text{Tf}_2\text{O}$  (6.38 mmol, 1.073 mL) at  $0$  °C, the reaction mixture was stirred at room temperature for 3 h. The reaction mixture was quenched with water, the aqueous layer was extracted three times with DCM and separated organic layer was washed with brine, dried over  $\text{Na}_2\text{SO}_4$  and concentrated under reduced pressure. The crude product was purified by column chromatography (silica gel, PE/DCM = 10/1) to afford the product **5** as a white solid (3.05 g, 90%). M.P. = 169–171 °C.  $R_f$  = 0.62 (PE/EA = 50/1).  $^1\text{H}$  NMR (400 MHz,

CDCl<sub>3</sub>):  $\delta$  8.75 (d,  $J$  = 8.0 Hz, 2H), 8.15 (dd,  $J$  = 8.4, 1.2 Hz, 2H), 7.81 (d,  $J$  = 8.8 Hz, 1H), 7.75 (d,  $J$  = 2.8 Hz, 1H), 7.68 (t,  $J$  = 7.6 Hz, 2H), 7.58 (tdd,  $J$  = 10.0, 3.2, 1.2 Hz, 2H), 7.29 (dd,  $J$  = 8.8, 2.8 Hz, 1H), 7.17–7.05 (m, 8H), 6.95–6.91 (m, 2H); <sup>13</sup>C NMR (100 MHz, CDCl<sub>3</sub>):  $\delta$  147.4, 147.2, 146.3, 146.1, 145.0, 137.4, 137.2, 130.2, 130.1, 129.2, 129.2, 129.1, 129.1, 127.6, 127.2, 127.2, 126.8, 124.5, 123.2, 122.4, 122.3, 118.9 (q,  $J$  = 319.1 Hz), 118.2, 117.9, 117.7; <sup>19</sup>F NMR (376 MHz, CDCl<sub>3</sub>):  $\delta$  -72.5; HRMS (EI): calcd. for C<sub>33</sub>H<sub>21</sub>F<sub>3</sub>N<sub>2</sub>O<sub>3</sub>S: 582.1225; found: 582.1224.

### 9,14-diphenyl-11-(4,4,5,5-tetramethyl-1,3,2-dioxaborolan-2-yl)-9,14-dihydrodibenzo[a,c]phenazine (6)

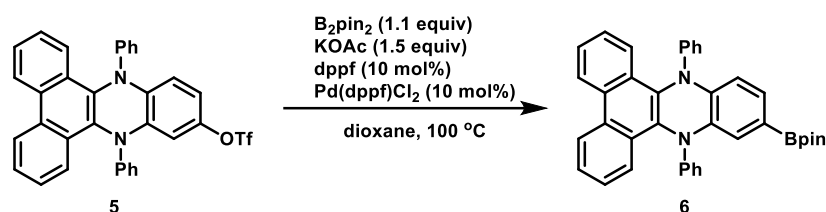

An oven-dried Schlenk tube containing a stirring bar was charged with **5** (0.2 mmol, 116.5 mg), B<sub>2</sub>pin<sub>2</sub> (0.22 mmol, 55.9 mg), KOAc (0.3 mmol, 29.4 mg), Pd(dppf)Cl<sub>2</sub> (0.02 mmol 14.6 mg), dppf (0.02 mmol, 11.1 mg). Then the Schlenk tube was evacuated and backfilled with N<sub>2</sub> (This process was repeated for three times). 4 mL 1,4-dioxane was then added and the tube was equipped with a balloon filled with N<sub>2</sub> at 100 °C for 12 h. The reaction mixture was quenched with water, the aqueous layer was extracted three times with EtOAc and separated organic layer was washed with brine, dried over Na<sub>2</sub>SO<sub>4</sub> and concentrated under reduced pressure. The crude product was purified by column chromatography (silica gel, PE/DCM = 20/1–5/1) to afford the product **6** as a white solid (63.9 mg, 57%). M.P. = 165–166 °C; *R*<sub>f</sub> = 0.50 (PE/EA = 20/1); <sup>1</sup>H NMR (400 MHz, CDCl<sub>3</sub>):  $\delta$  8.73 (d,  $J$  = 7.6 Hz, 2H), 8.21 (s, 1H), 8.12 (dd,  $J$  = 14.4, 8.0 Hz, 2H), 7.80 (q,  $J$  = 7.2 Hz, 2H), 7.66–7.51 (m, 4H), 7.05–6.98 (m, 8H), 6.82–6.77 (m, 2H), 1.40 (s, 12H); <sup>13</sup>C NMR (100 MHz, CDCl<sub>3</sub>):  $\delta$  148.0, 147.9, 144.2, 138.2, 138.0, 133.8, 132.2, 130.0, 130.0, 129.6, 129.5, 128.9, 128.8, 127.1, 127.0, 126.0, 126.0, 124.7, 123.1, 123.1, 121.4, 121.0, 117.2, 116.7, 84.1, 25.0; HRMS ESI: (m/z) [M+H]<sup>+</sup>: calcd. for C<sub>38</sub>H<sub>34</sub>BN<sub>2</sub>O<sub>2</sub>: 561.2708.; found: 561.2711.

### 9,14-diphenyl-11-((trimethylsilyl)ethynyl)-9,14-dihydrodibenzo[a,c]phenazine (7a) and 11-ethynyl-9,14-diphenyl-9,14-dihydrodibenzo[a,c]phenazine (7b)

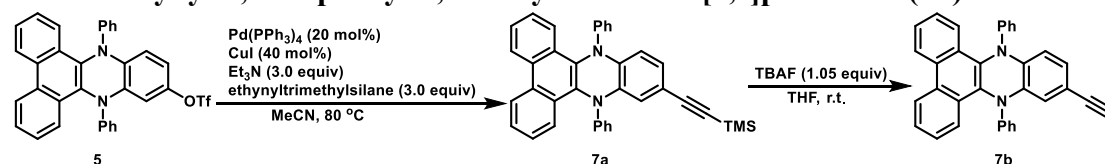

An oven-dried Schlenk tube containing a stirring bar was charged with **5** (0.687 mmol, 400 mg), CuI (0.275 mmol, 53 mg), Pd(PPh<sub>3</sub>)<sub>4</sub> (0.137 mmol, 159 mg). Then the sealed tube was evacuated and backfilled with N<sub>2</sub> (This process was repeated for three times). 10 mL MeCN and ethynyltrimethylsilane (2.061 mmol, 286  $\mu$ L) were then added at room temperature and the reaction mixture was stirred at 110 °C for 12 h. The reaction

mixture was quenched with water, the aqueous layer was extracted three times with EtOAc and separated organic layer was washed with brine, dried over Na<sub>2</sub>SO<sub>4</sub> and concentrated under reduced pressure. The crude product was purified by column chromatography (silica gel, PE/DCM = 10/1) to afford the product **7a** as a yellow solid (287.1 mg, 79%). M.P. = 108–109 °C; *R*<sub>f</sub> = 0.58 (PE/EA = 30/1). <sup>1</sup>H NMR (400 MHz, CDCl<sub>3</sub>): δ 8.73 (d, *J* = 8.4 Hz, 2H), 8.10 (ddd, *J* = 9.6, 8.4, 1.2 Hz, 2H), 7.86 (d, *J* = 1.6 Hz, 1H), 7.68–7.62 (m, 3H), 7.57–7.51 (m, 2H), 7.46 (dd, *J* = 8.4, 2.0 Hz, 1H), 7.07–7.03 (m, 4H), 6.99–6.97 (m, 4H), 6.85–6.80 (m, 2H), 0.30 (s, 9H); <sup>13</sup>C NMR (100 MHz, CDCl<sub>3</sub>): δ 147.7, 147.5, 145.5, 144.5, 137.8, 137.7, 130.7, 130.1, 130.0, 129.5, 129.4, 129.3, 129.0, 129.0, 127.2, 127.1, 126.8, 126.7, 126.7, 124.7, 124.6, 123.2, 123.1, 121.7, 121.5, 120.3, 117.5, 117.1, 104.6, 94.8, 0.1; **HRMS ESI**: (*m/z*) [*M*+H]<sup>+</sup>: calcd. for C<sub>37</sub>H<sub>31</sub>N<sub>2</sub>Si: 531.2251; found: 531.2245.

To a round-bottomed flask with **7a** (6 mmol, 3.18 g) in THF (70 ml) was added TBAF (6.3 mmol, 1 M in THF, 6.3 mL) at room temperature for 5 min. The reaction mixture was quenched with water, the aqueous layer was extracted three times with EtOAc and separated organic layer was washed with brine, dried over Na<sub>2</sub>SO<sub>4</sub> and concentrated under reduced pressure. The crude product was purified by column chromatography (silica gel, PE/DCM = 10/1 to 8/1) to afford the product **7b** as a white solid (2.31 g, 84%). M.P. = 202–203 °C; *R*<sub>f</sub> = 0.58 (PE/EA = 30/1). <sup>1</sup>H NMR (400 MHz, CDCl<sub>3</sub>): δ 8.75 (d, *J* = 8.4 Hz, 2H), 8.16 (ddd, *J* = 8.8, 8.4, 1.2 Hz, 2H), 7.96 (d, *J* = 1.6 Hz, 1H), 7.74 (d, *J* = 8.0 Hz, 1H), 7.66 (ddt, *J* = 8.4, 7.6, 1.6 Hz, 2H), 7.60–7.55 (m, 2H), 7.53 (dd, *J* = 8.4, 1.6 Hz, 1H), 7.12–7.05 (m, 8H), 6.90–6.85 (m, 2H), 3.19 (s, 1H); <sup>13</sup>C NMR (100 MHz, CDCl<sub>3</sub>): δ 147.6, 147.4, 145.7, 144.6, 137.7, 137.6, 130.8, 130.1, 130.0, 129.5, 129.4, 129.3, 129.0, 129.0, 127.2, 127.1, 126.9, 126.7, 126.7, 124.6, 124.6, 123.2, 123.1, 121.8, 121.6, 119.2, 117.6, 117.3, 83.2, 77.8; **HRMS ESI**: (*m/z*) [*M*+H]<sup>+</sup>: calcd. for C<sub>34</sub>H<sub>23</sub>N<sub>2</sub>: 459.1856; found: 459.1850.

### 11-(naphthalen-2-yl)-9,14-diphenyl-9,14-dihydrodibenzo[*a,c*]phenazine (**8a**)

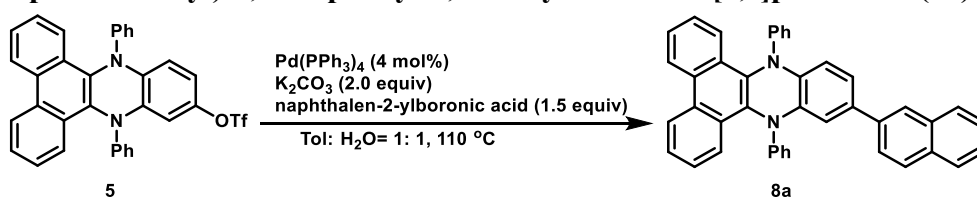

An oven-dried Schlenk tube containing a stirring bar was charged with **5** (0.5 mmol, 291.3 mg), K<sub>2</sub>CO<sub>3</sub> (1.0 mmol, 138.2 mg), naphthalen-1-ylboronic acid (0.75 mmol, 129.0 mg), Pd(PPh<sub>3</sub>)<sub>4</sub> (0.002 mmol, 23.1 mg). Then the sealed tube was evacuated and backfilled with N<sub>2</sub> (This process was repeated for three times). 2.5 mL toluene and 2.5 mL H<sub>2</sub>O were then added at room temperature and the reaction mixture was stirred at 110 °C for 12 h. The reaction mixture was quenched with sat. aq. NH<sub>4</sub>Cl, the aqueous layer was extracted three times with EtOAc and separated organic layer was washed with brine, dried over Na<sub>2</sub>SO<sub>4</sub> and concentrated under reduced pressure. The crude product was purified by column chromatography (silica gel, PE/DCM = 5/1) to afford the product **8a** as a pale-yellow solid (250.0 mg, 89%). M.P. = 274–275 °C; *R*<sub>f</sub> = 0.50 (PE/DCM = 3/1); <sup>1</sup>H NMR (400 MHz, CDCl<sub>3</sub>): 8.76 (d, *J* = 8.4 Hz, 2H), 8.19 (d, *J* =

7.6 Hz, 1H), 8.15 (d,  $J = 7.6$  Hz, 1H), 8.11 (dd,  $J = 10.8, 2.0$  Hz, 2H), 7.95 (t,  $J = 8.8$  Hz, 2H), 7.92–7.79 (m, 3H), 7.75–7.62 (m, 3H), 7.62–7.47 (m, 4H), 7.13–6.98 (m, 8H), 6.88–6.75 (m, 2H).  $^{13}\text{C}$  NMR (100 MHz,  $\text{CDCl}_3$ ):  $\delta$  147.9, 147.8, 145.2, 144.4, 138.7, 138.3, 138.2, 137.8, 133.8, 132.8, 130.1, 130.1, 129.7, 129.5, 129.0, 128.8, 128.4, 127.8, 127.5, 127.2, 127.1, 126.7, 126.6, 126.4, 126.2, 125.9, 125.6, 124.8, 124.7, 124.6, 123.2, 121.4, 121.3, 117.2, 116.9. **HRMS ESI:** ( $m/z$ )  $[\text{M}+\text{H}]^+$ : calcd. for  $\text{C}_{42}\text{H}_{29}\text{N}_2$ : 561.2325; found: 561.2310.

#### 11-(naphthalen-1-yl)-9,14-diphenyl-9,14-dihydrodibenzo[a,c]phenazine (8b)

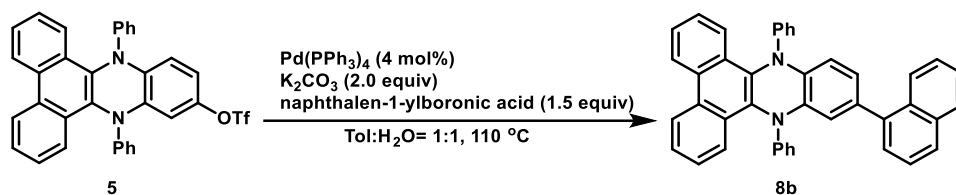

An oven-dried Schlenk tube containing a stirring bar was charged with **5** (0.5 mmol, 291.3 mg),  $\text{K}_2\text{CO}_3$  (1.0 mmol, 138.2 mg), naphthalen-1-ylboronic acid (0.75 mmol, 129.0 mg),  $\text{Pd}(\text{PPh}_3)_4$  (0.02 mmol, 23.1 mg). Then the sealed tube was evacuated and backfilled with  $\text{N}_2$  (This process was repeated for three times). 2.5 mL toluene and 2.5 mL  $\text{H}_2\text{O}$  were then added at room temperature and the reaction mixture was stirred at 110 °C for 23 h. The reaction mixture was quenched with sat. aq.  $\text{NH}_4\text{Cl}$ , the aqueous layer was extracted three times with EtOAc and separated organic layer was washed with brine, dried over  $\text{Na}_2\text{SO}_4$  and concentrated under reduced pressure. The crude product was purified by column chromatography (silica gel, PE/DCM = 5/1) to afford the product **8b** as a pale-yellow solid (240.8 mg, 86%). M.P. = 297–298 °C;  $R_f$  = 0.50 (PE/DCM = 3/1);  $^1\text{H}$  NMR (400 MHz,  $\text{CDCl}_3$ ):  $\delta$  8.76 (d,  $J = 8.4$  Hz, 2H), 8.16 (dd,  $J = 8.0, 0.8$  Hz, 1H), 8.10 (dd,  $J = 8.0, 0.8$  Hz, 1H), 8.02 (d,  $J = 8.4$  Hz, 1H), 7.96–7.85 (m, 4H), 7.66 (dtd,  $J = 8.0, 6.8, 1.2$  Hz, 2H), 7.59–7.44 (m, 7H), 7.12–7.02 (m, 8H), 6.88–6.78 (m, 2H).  $^{13}\text{C}$  NMR (100 MHz,  $\text{CDCl}_3$ ):  $\delta$  147.9, 147.9, 144.8, 144.0, 139.5, 138.2, 138.1, 138.1, 134.0, 131.8, 130.1, 129.6, 129.5, 129.0, 129.0, 128.8, 128.5, 128.1, 127.2, 127.2, 127.2, 127.1, 126.9, 126.7, 126.4, 126.1, 126.1, 125.6, 124.7, 123.2, 123.2, 121.4, 121.4, 117.3, 117.3. **HRMS ESI:** ( $m/z$ )  $[\text{M}+\text{H}]^+$ : calcd. for  $\text{C}_{42}\text{H}_{29}\text{N}_2$ : 561.2325; found: 561.2309.

## 4. X-ray Crystallography

Single crystals suitable for X-ray crystal analysis were obtained from EtOAc and DCM provided good quality crystals. Details of crystal data and structural refinements are given.

**X-ray crystallographic data of compound (3f).** (CCDC 1973195)

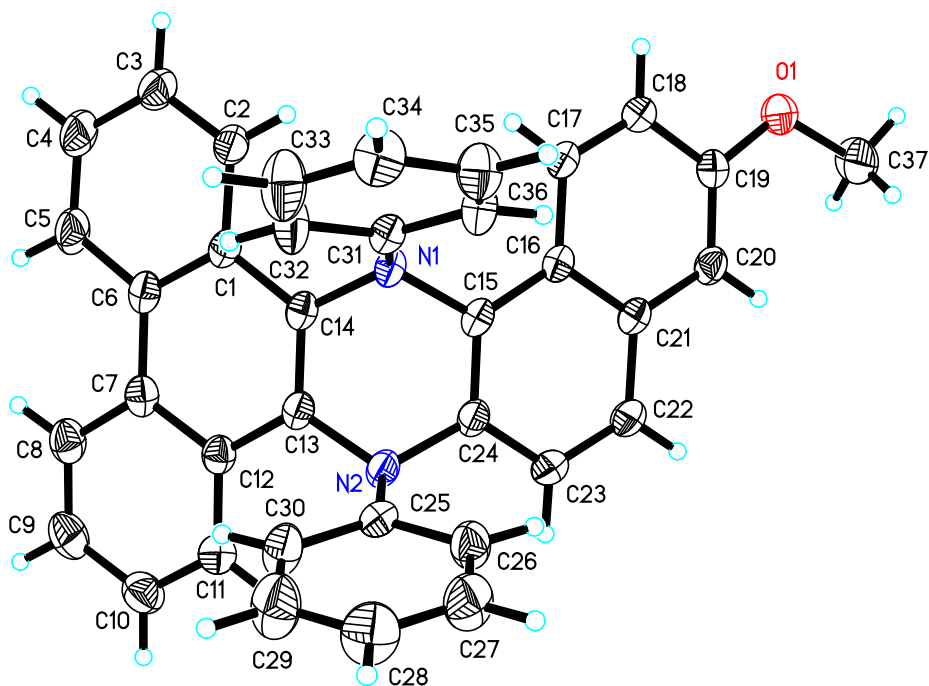

ORTEP of **3f** showing thermal ellipsoids at the 30% probability level.

Single crystal X-ray diffraction data was collected at 193(2) K for **3f** on a Bruker D8 Venture diffractometer.

Table 1. Crystal data and structure refinement of **3f**.

|                        |                                                  |                   |
|------------------------|--------------------------------------------------|-------------------|
| Identification code    | mo_d8v181051_0m                                  |                   |
| Empirical formula      | C <sub>37</sub> H <sub>26</sub> N <sub>2</sub> O |                   |
| Formula weight         | 514.60                                           |                   |
| Temperature            | 293(2) K                                         |                   |
| Wavelength             | 0.71073 Å                                        |                   |
| Crystal system         | Monoclinic                                       |                   |
| Space group            | P n                                              |                   |
| Unit cell dimensions   | a = 7.9242(3) Å                                  | α = 90 °          |
|                        | b = 9.1825(4) Å                                  | β = 93.0000(10) ° |
|                        | c = 18.6310(8) Å                                 | γ = 90 °          |
| Volume                 | 1353.81(10) Å <sup>3</sup>                       |                   |
| Z                      | 2                                                |                   |
| Density (calculated)   | 1.262 Mg/m <sup>3</sup>                          |                   |
| Absorption coefficient | 0.076 mm <sup>-1</sup>                           |                   |
| F(000)                 | 540                                              |                   |
| Crystal size           | 0.200 x 0.170 x 0.130 mm <sup>3</sup>            |                   |

|                                   |                                                             |
|-----------------------------------|-------------------------------------------------------------|
| Theta range for data collection   | 3.117 to 25.998 °                                           |
| Index ranges                      | -9<= <i>h</i> <=9, -11<= <i>k</i> <=11, -22<= <i>l</i> <=22 |
| Reflections collected             | 13446                                                       |
| Independent reflections           | 4726 [R(int) = 0.0350]                                      |
| Completeness to theta = 25.242 °  | 99.3 %                                                      |
| Absorption correction             | Semi-empirical from equivalents                             |
| Max. and min. transmission        | 0.7456 and 0.6222                                           |
| Refinement method                 | Full-matrix least-squares on F <sup>2</sup>                 |
| Data / restraints / parameters    | 4726 / 2 / 363                                              |
| Goodness-of-fit on F <sup>2</sup> | 1.086                                                       |
| Final R indices [I>2sigma(I)]     | R1 = 0.0355, wR2 = 0.0827                                   |
| R indices (all data)              | R1 = 0.0422, wR2 = 0.0877                                   |
| Absolute structure parameter      | -0.6(9)                                                     |
| Extinction coefficient            | 0.073(8)                                                    |
| Largest diff. peak and hole       | 0.117 and -0.103 e.Å <sup>-3</sup>                          |

## 5. Reference

- 1 H. Zhou, L. Sun, W. Chen, G. Tian, Y. Chen, Y. Li and J. Su, *Tetrahedron*, 2016, **72**, 2300-2305.
- 2 Z. Zhang, Y. S. Wu, K. C. Tang, C. L. Chen, J. W. Ho, J. Su, H. Tian and P. T. Chou, *J. Am. Chem. Soc.*, 2015, **137**, 8509-8520.



## 6. NMR Data

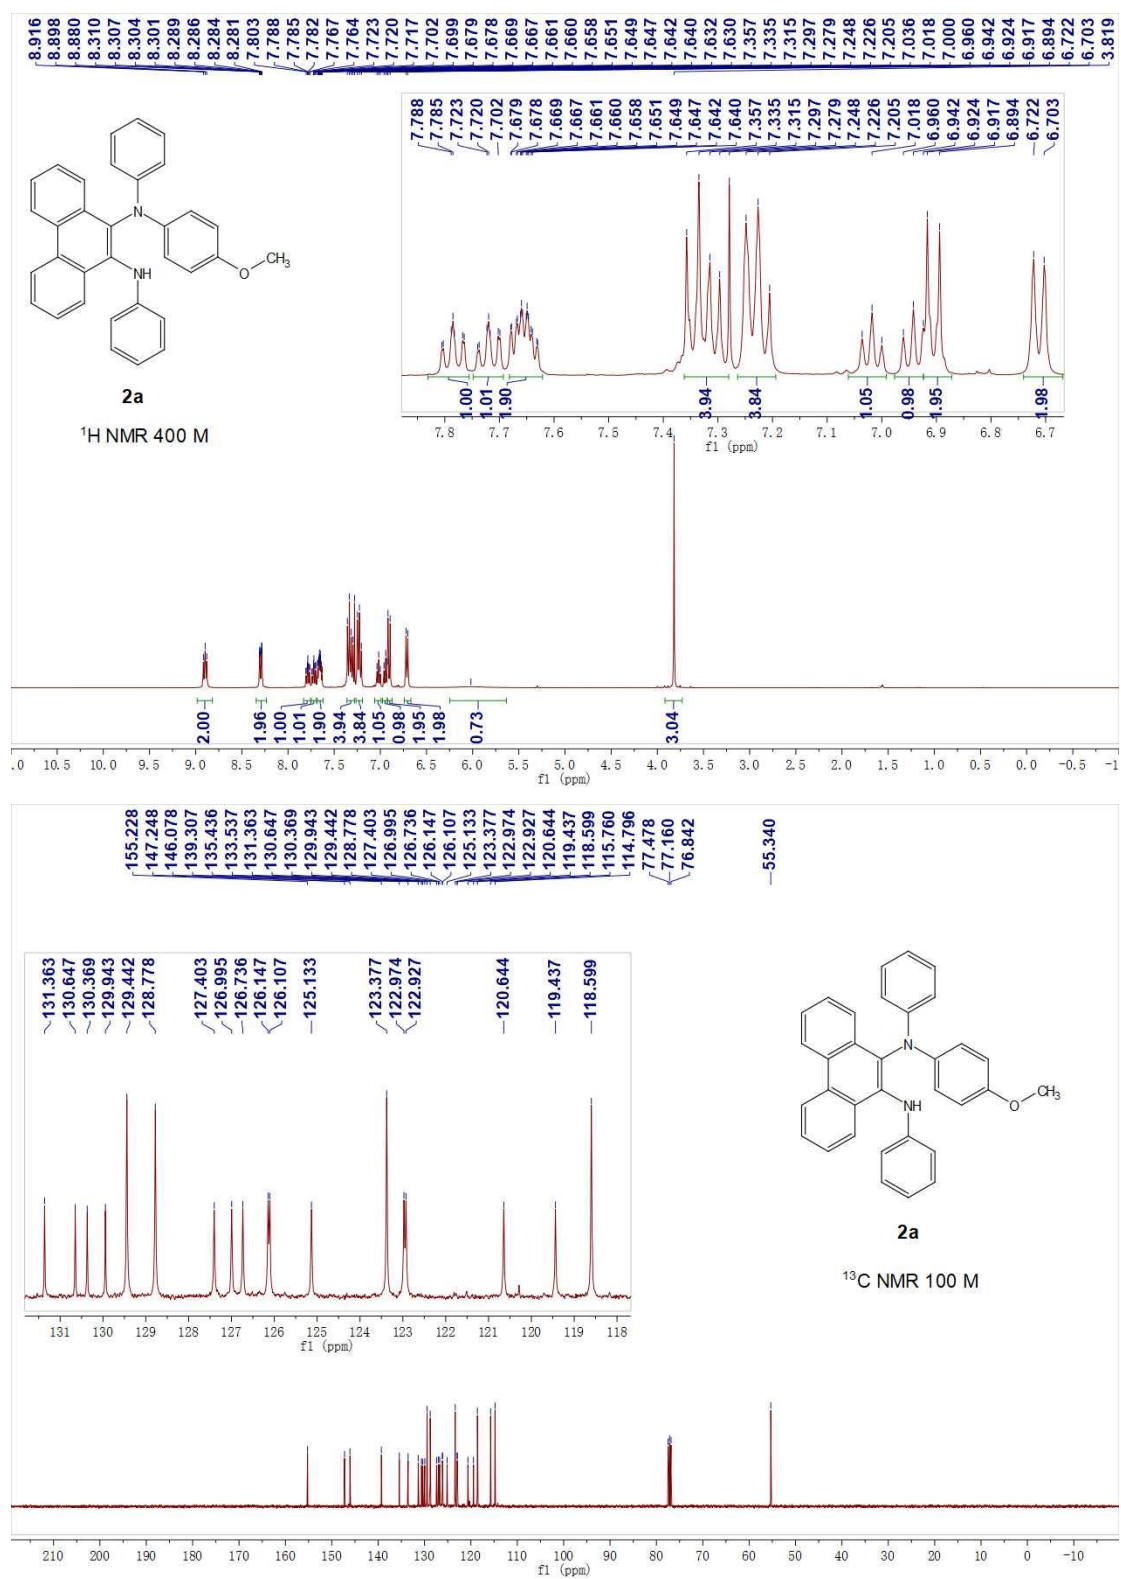

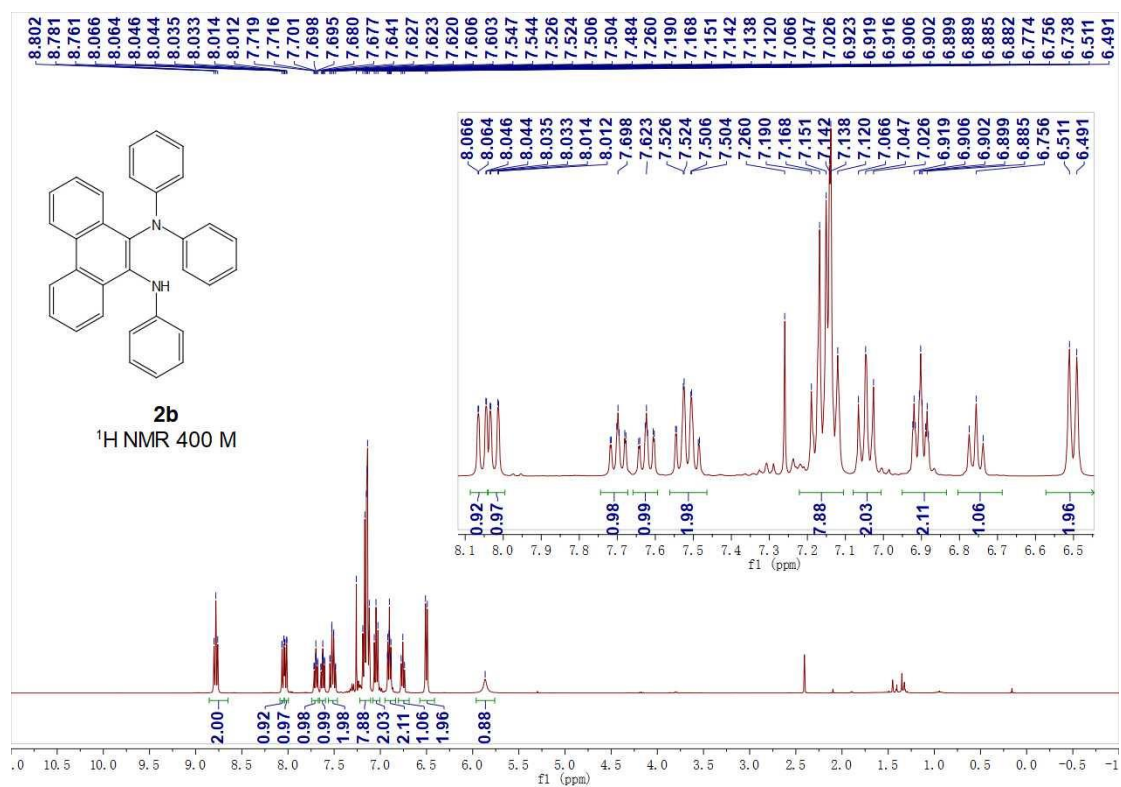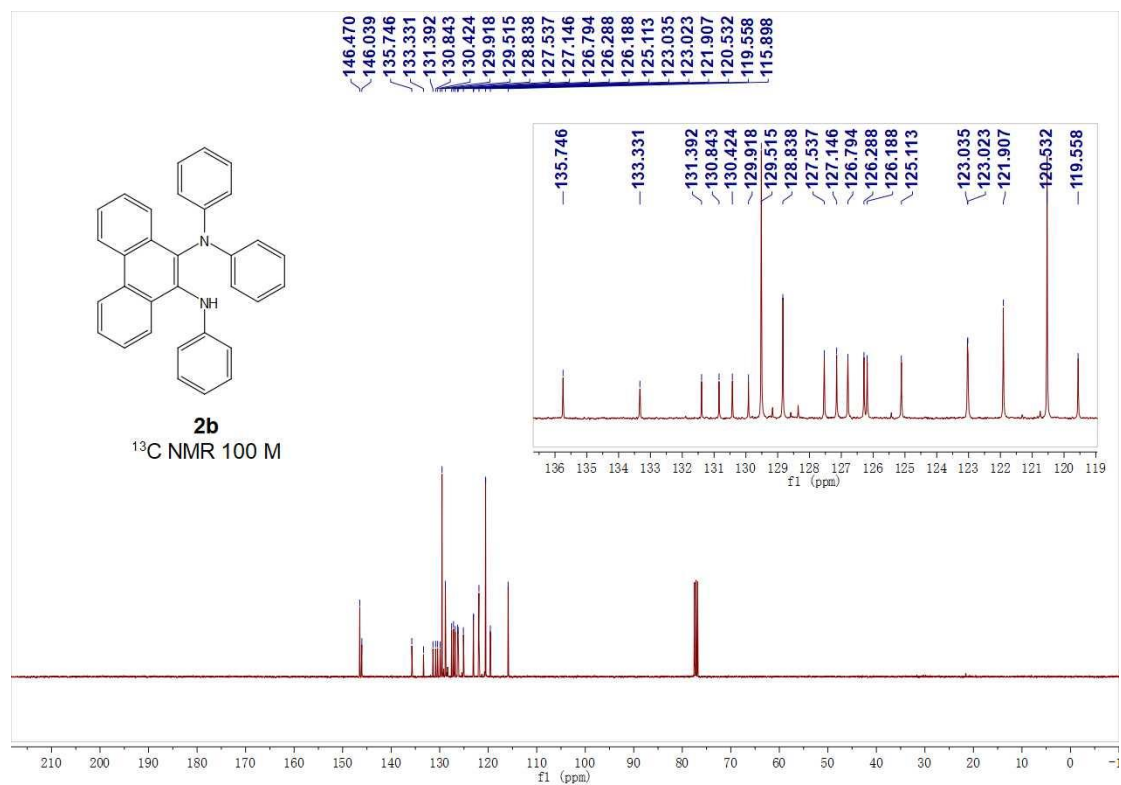

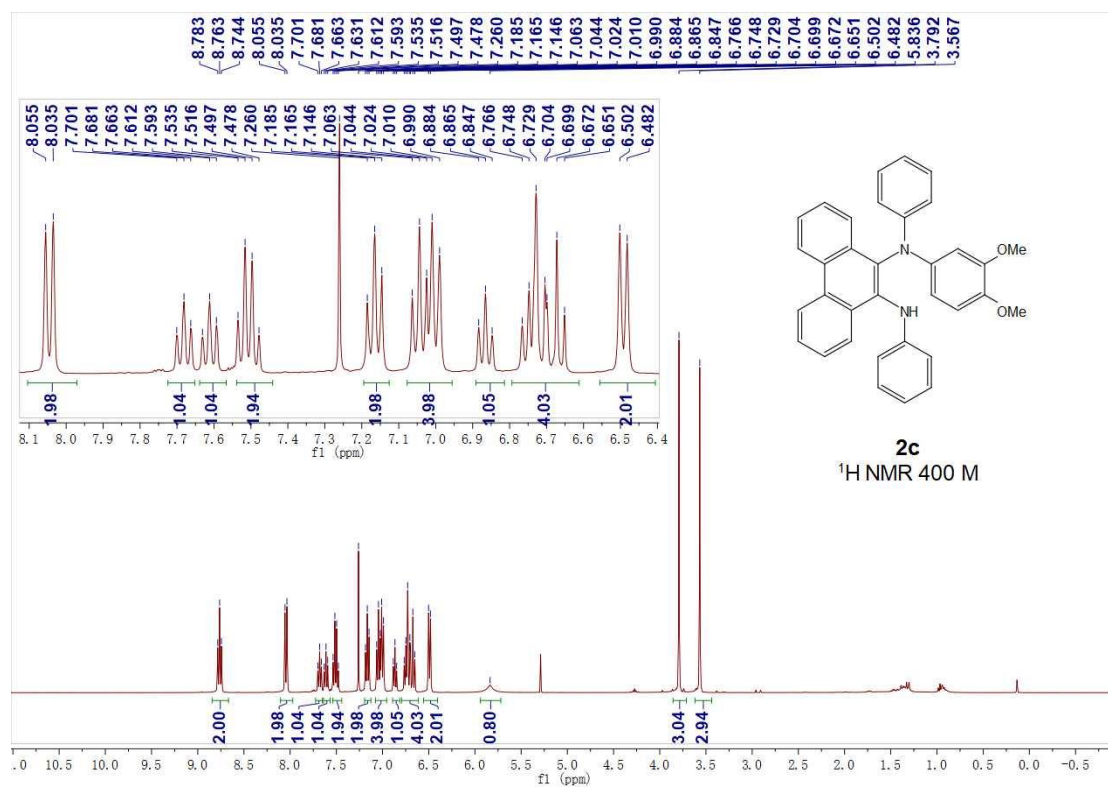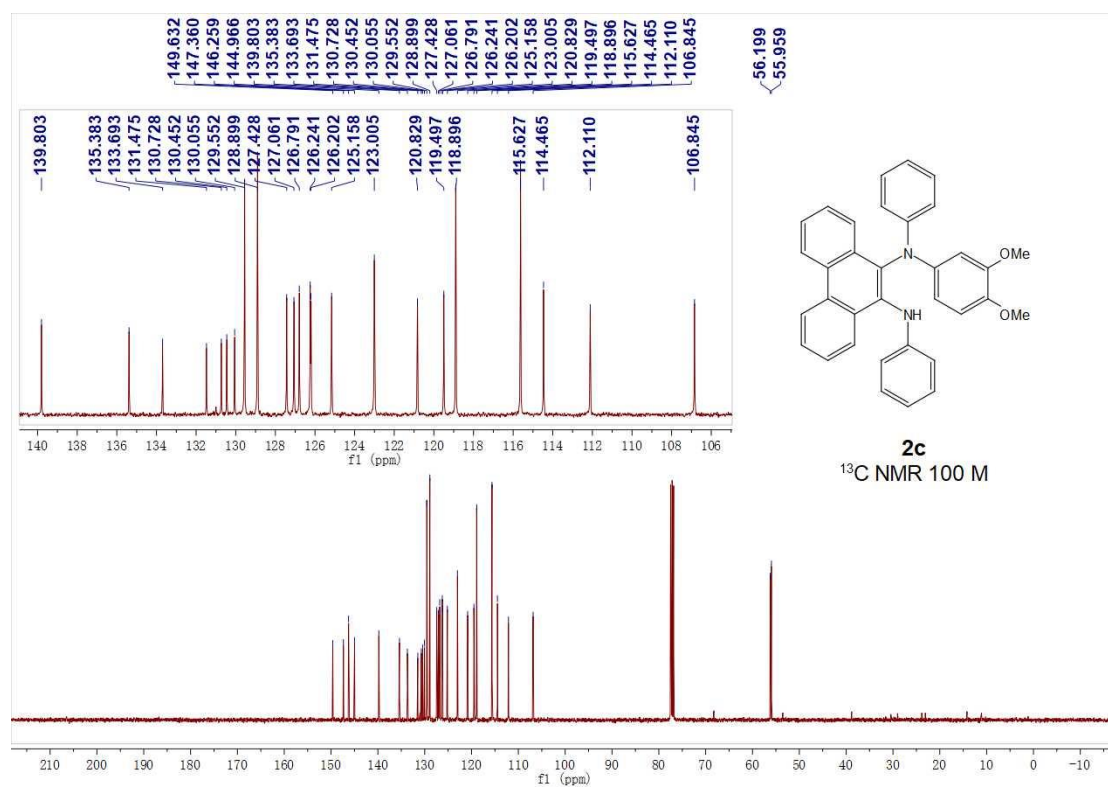

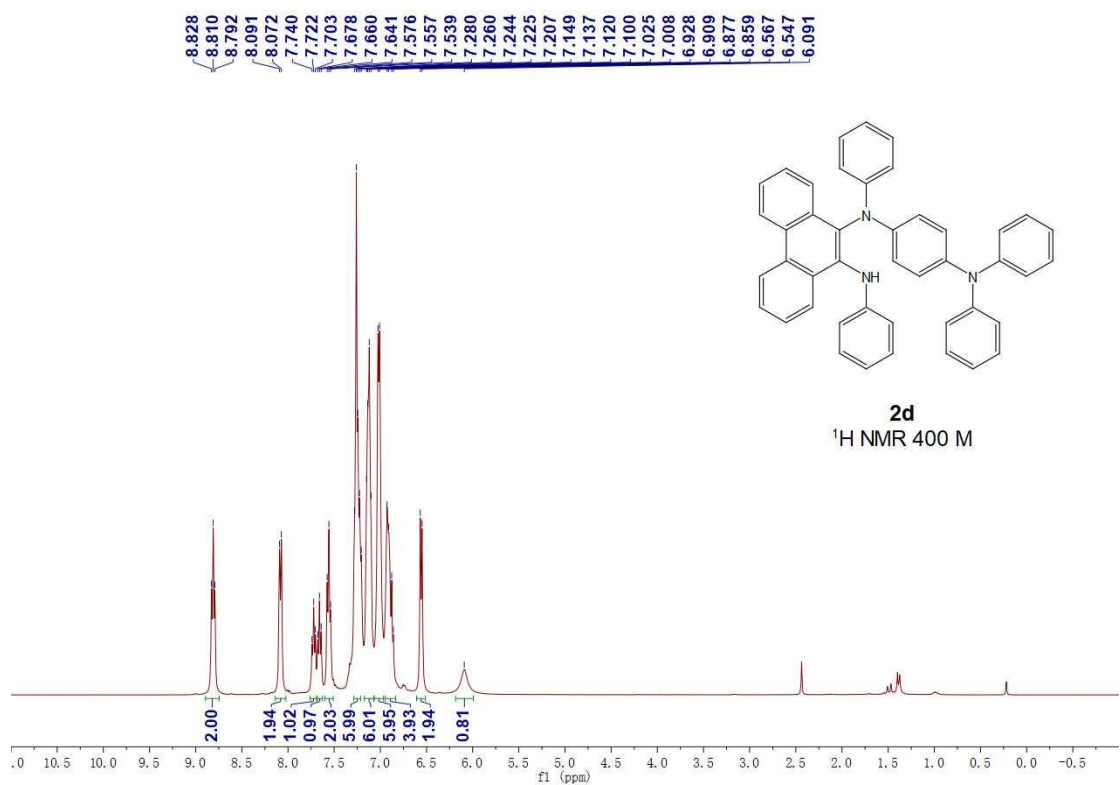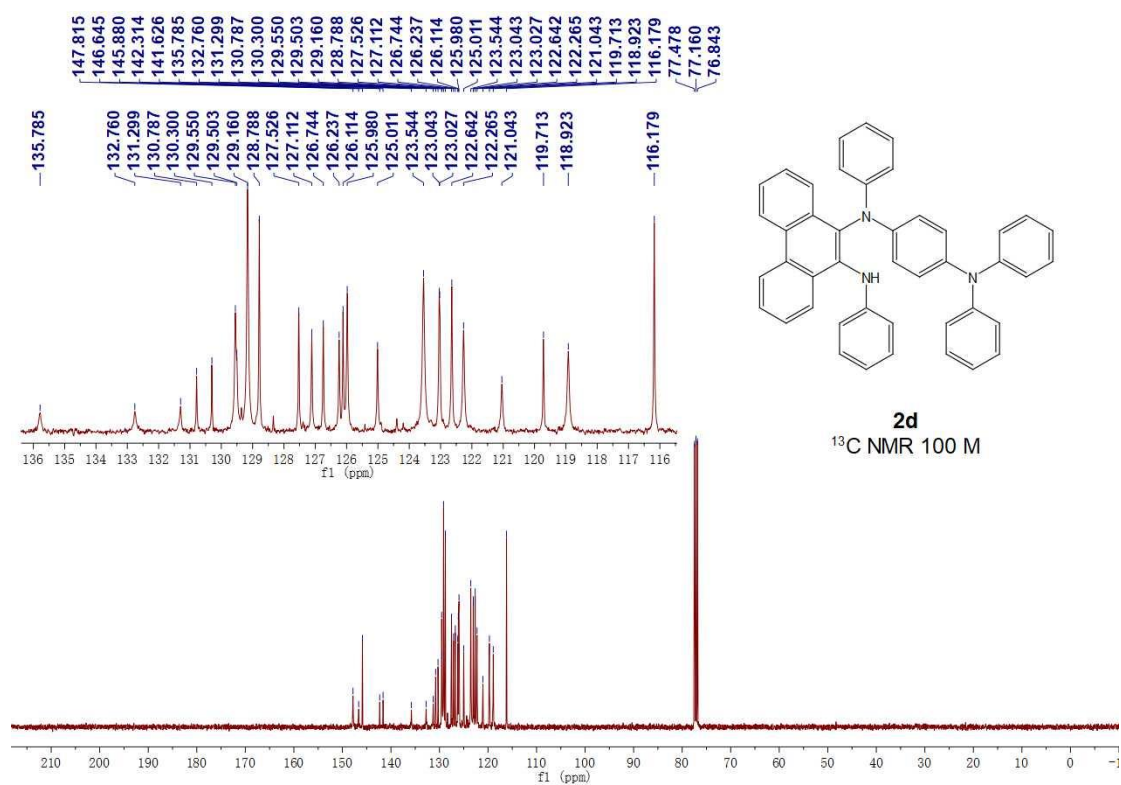



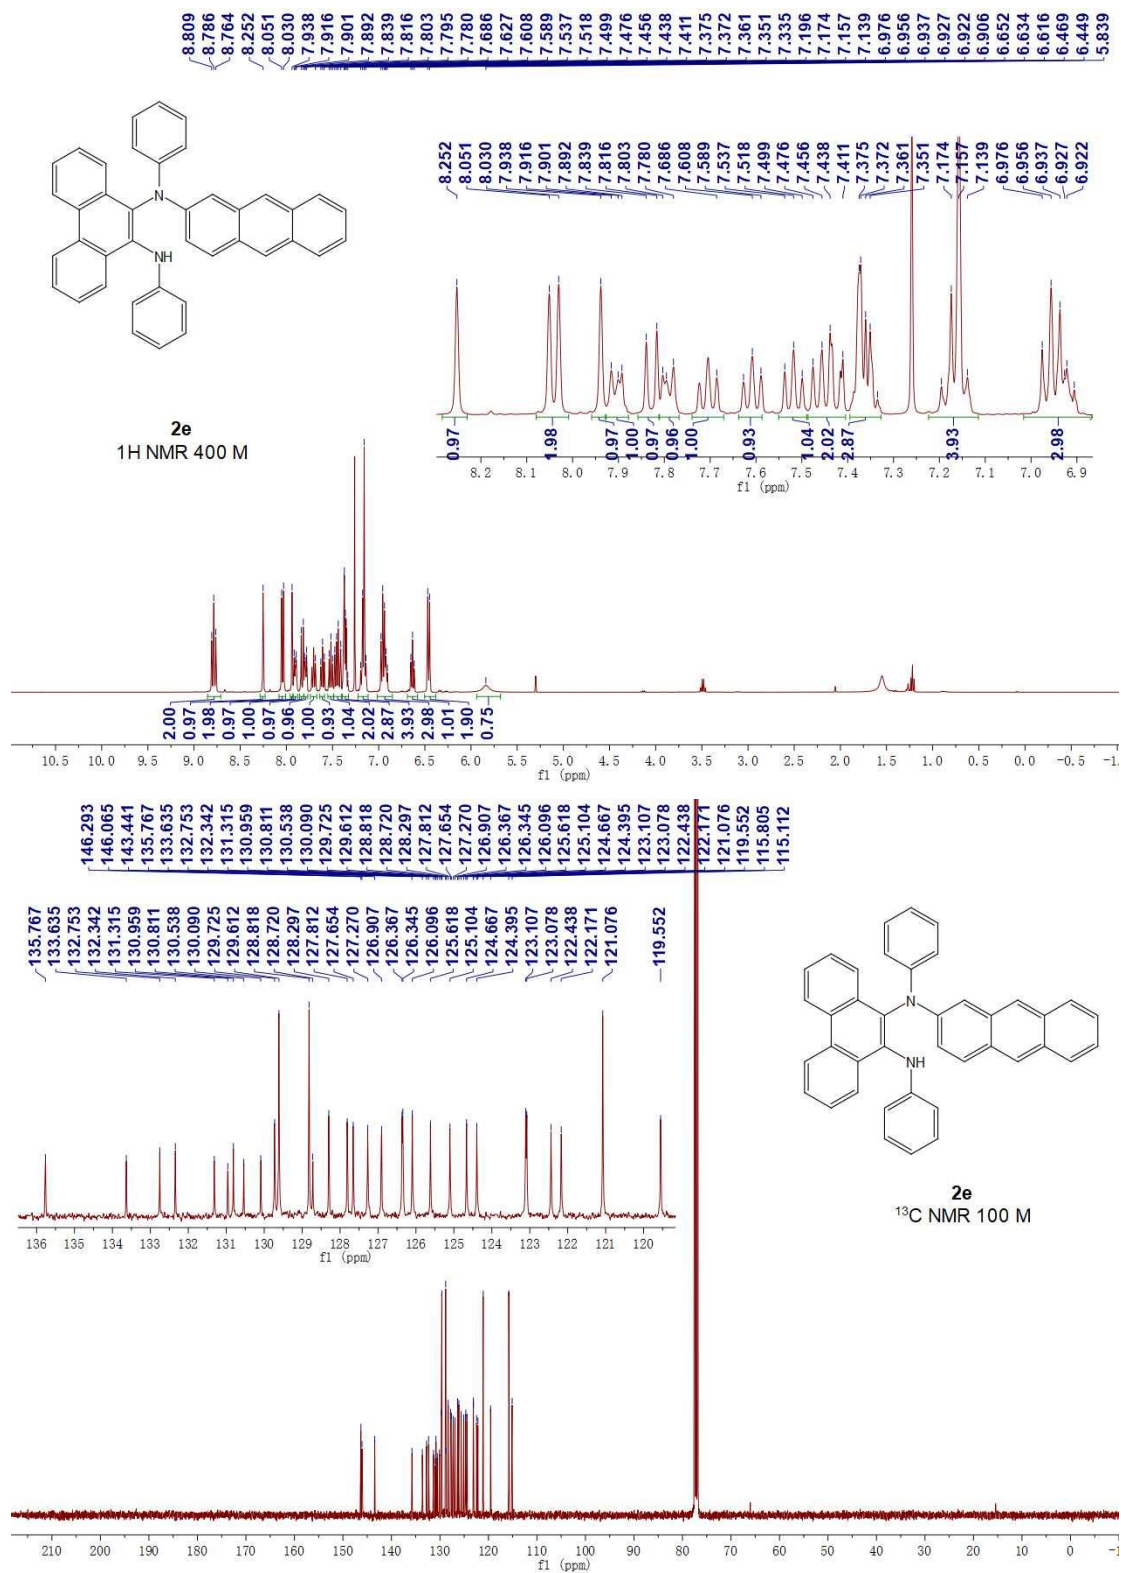

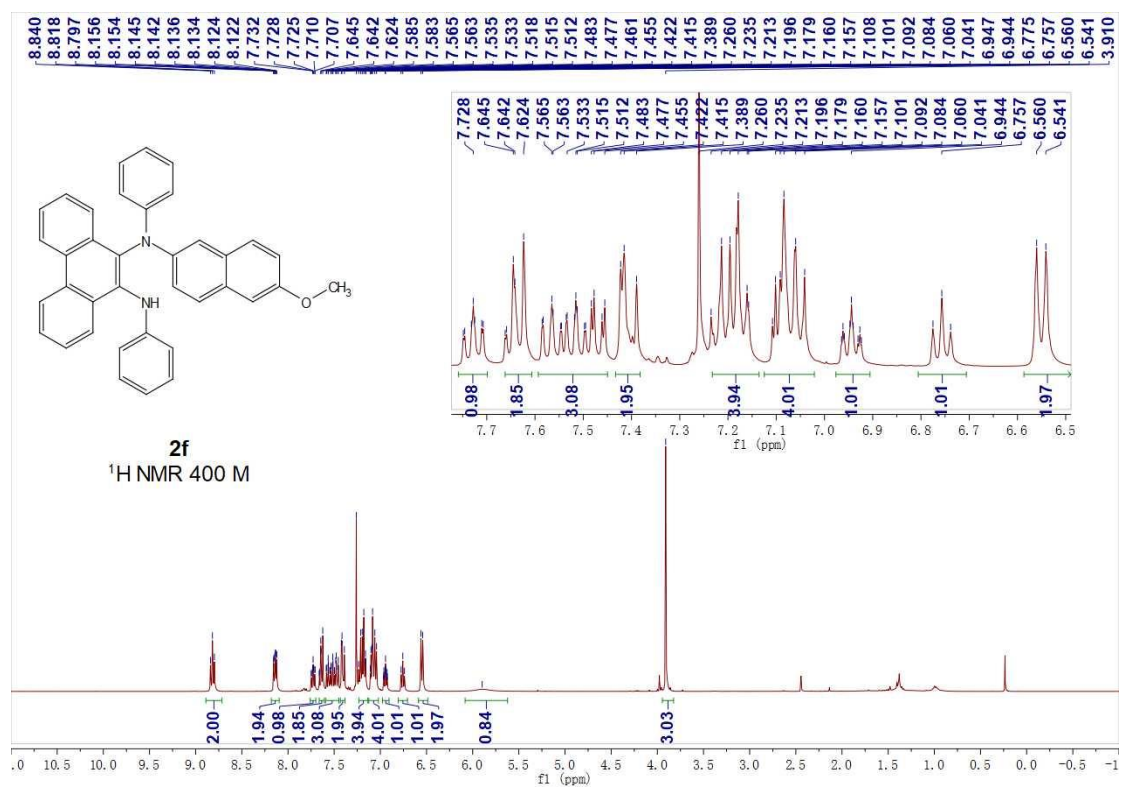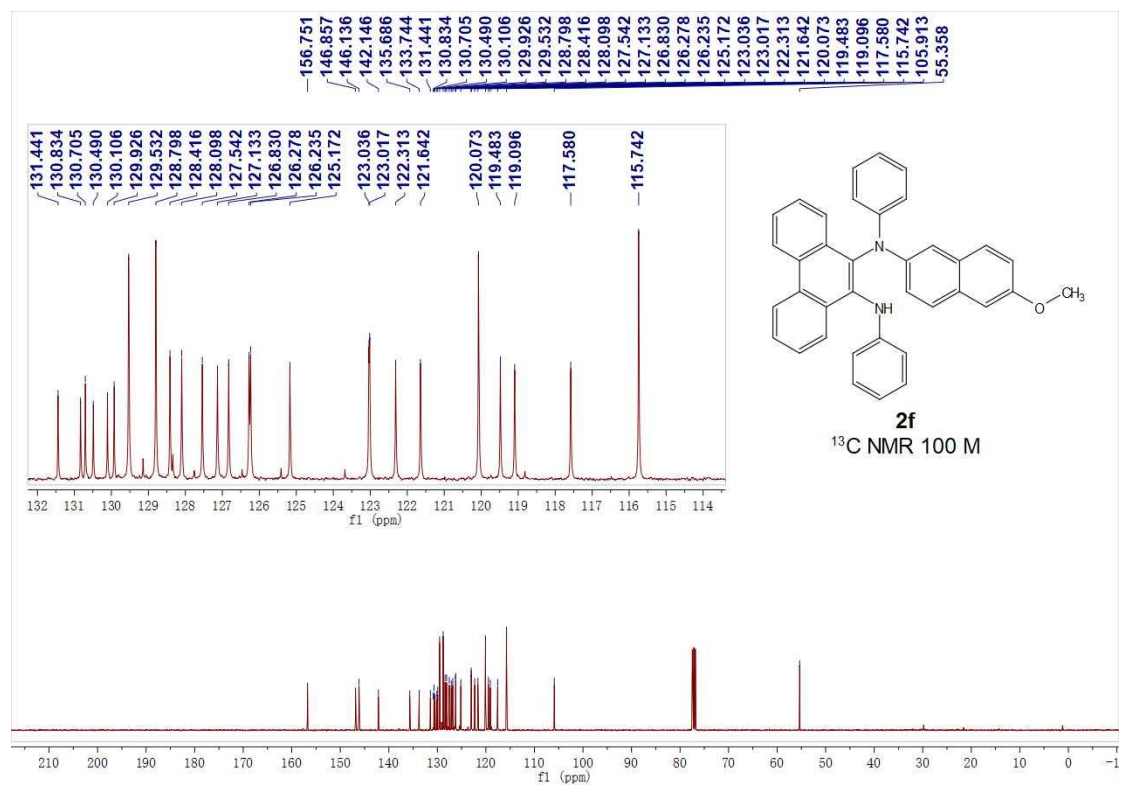

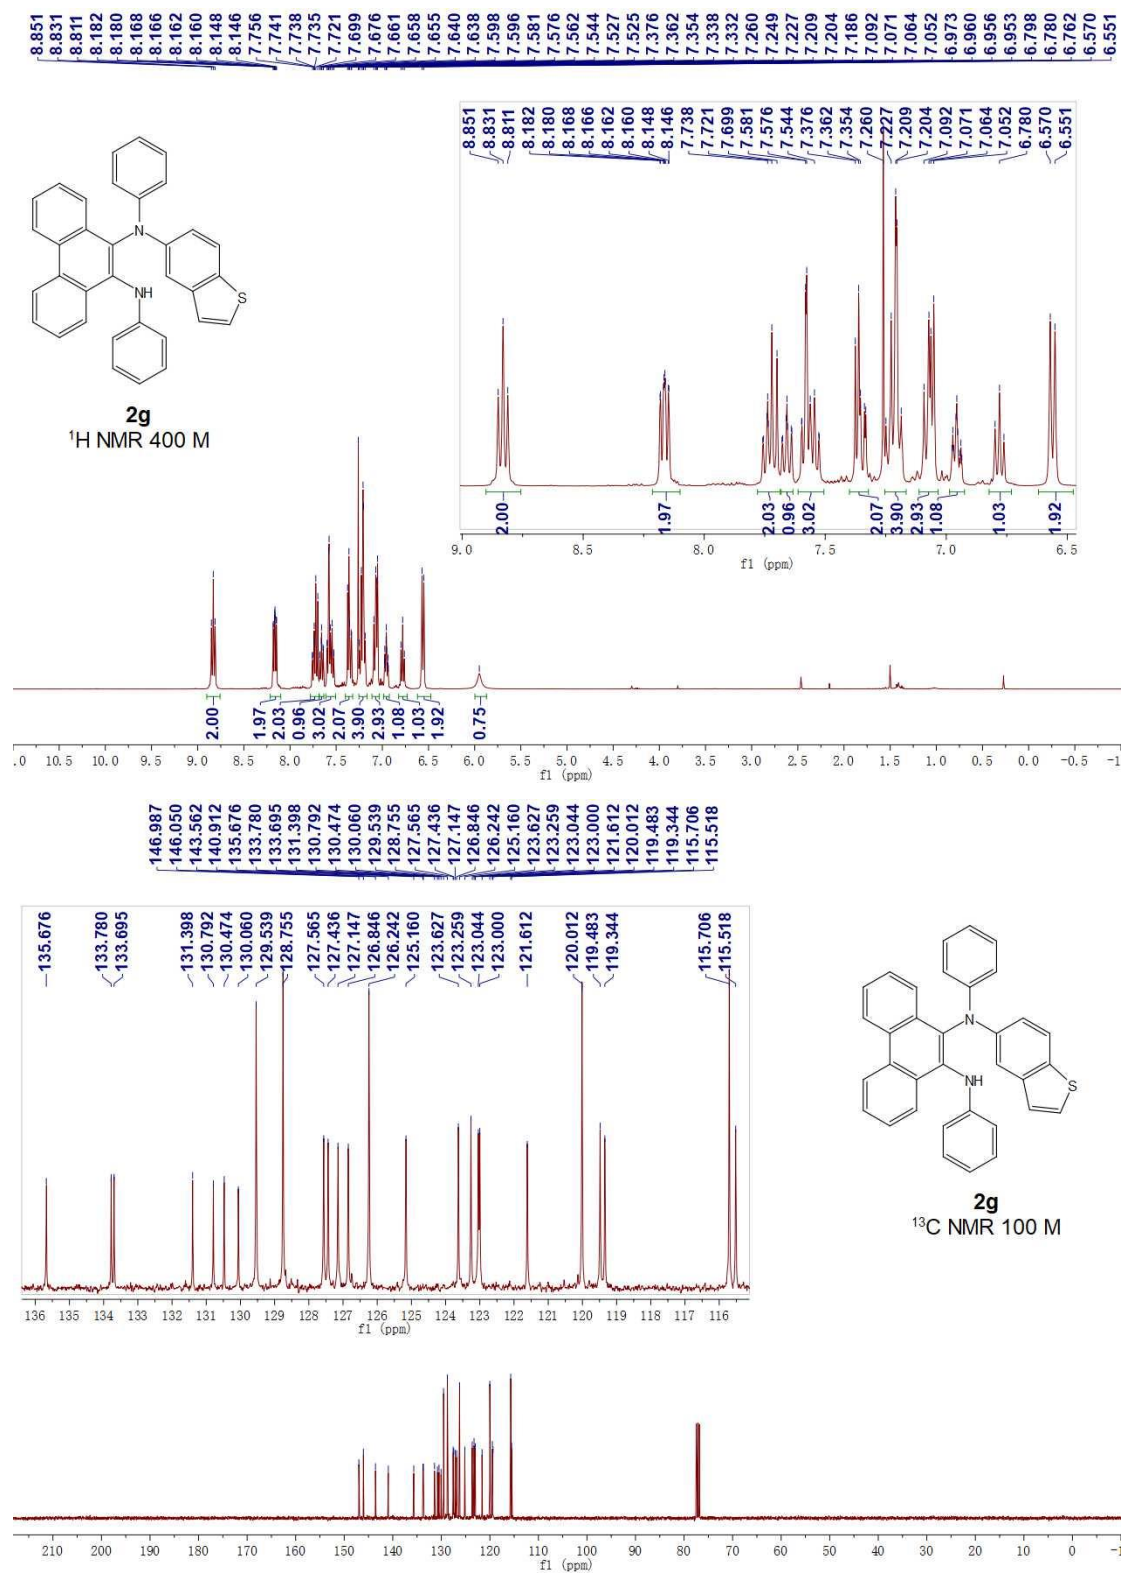

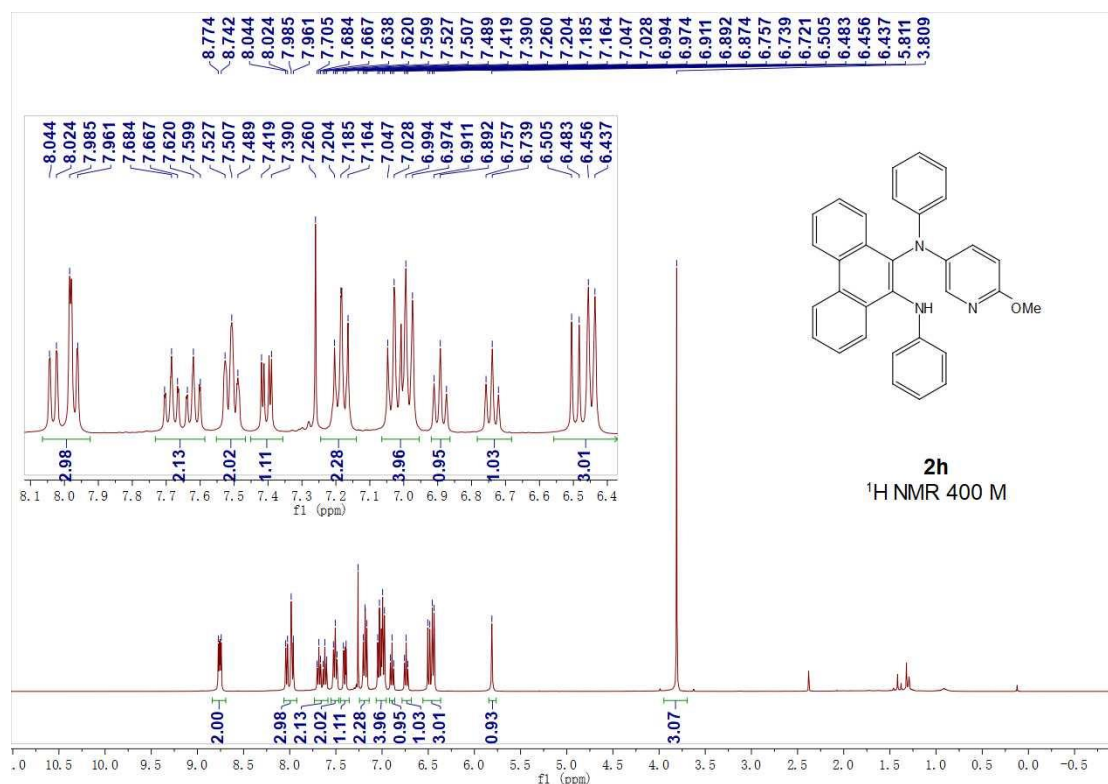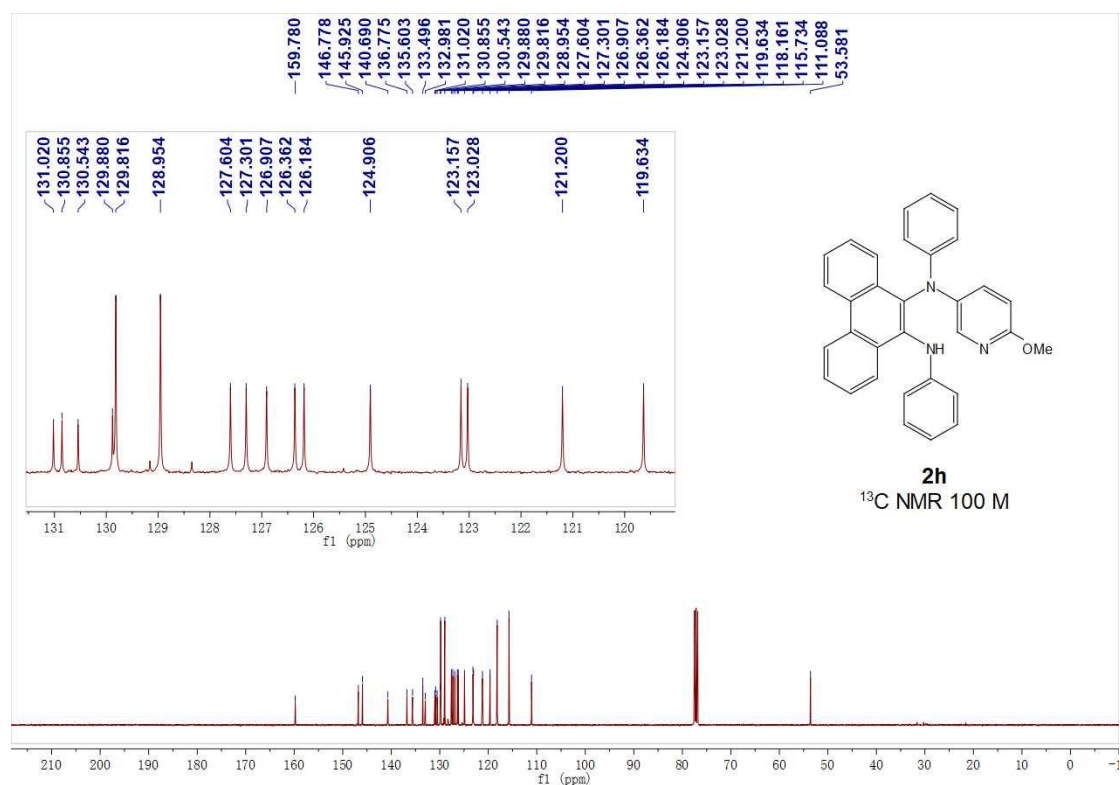





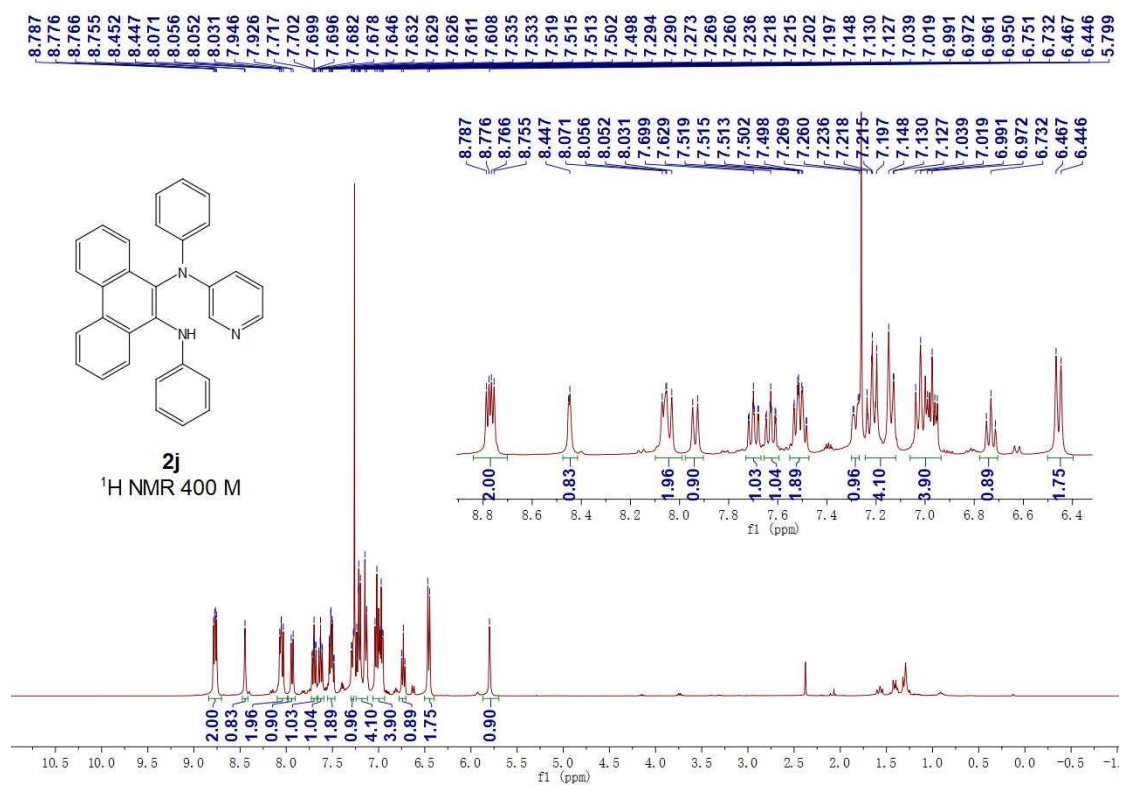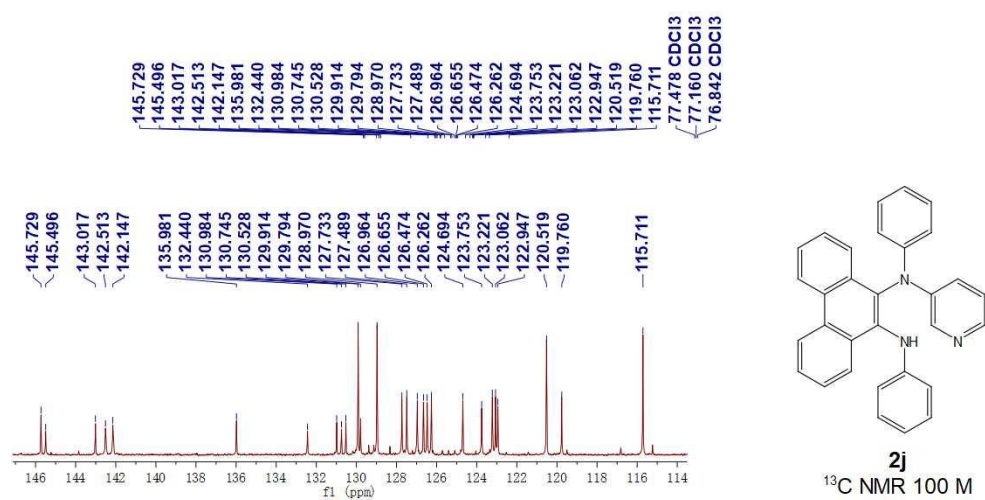

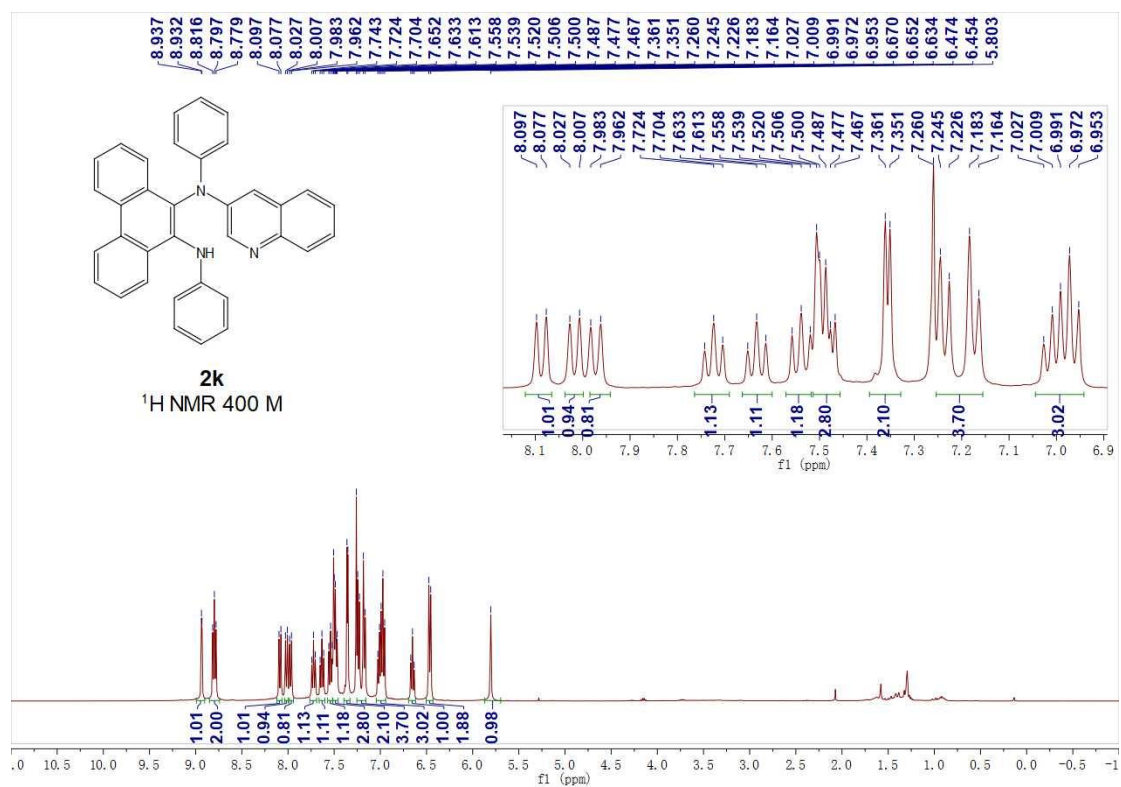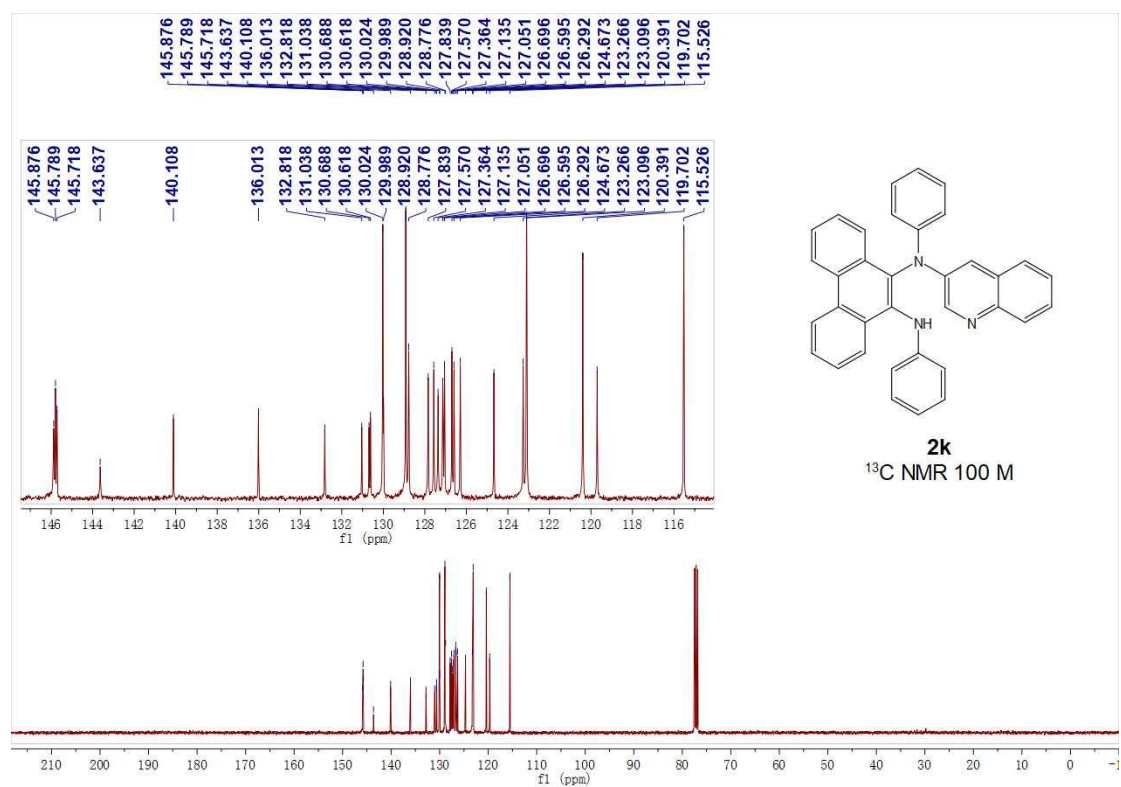

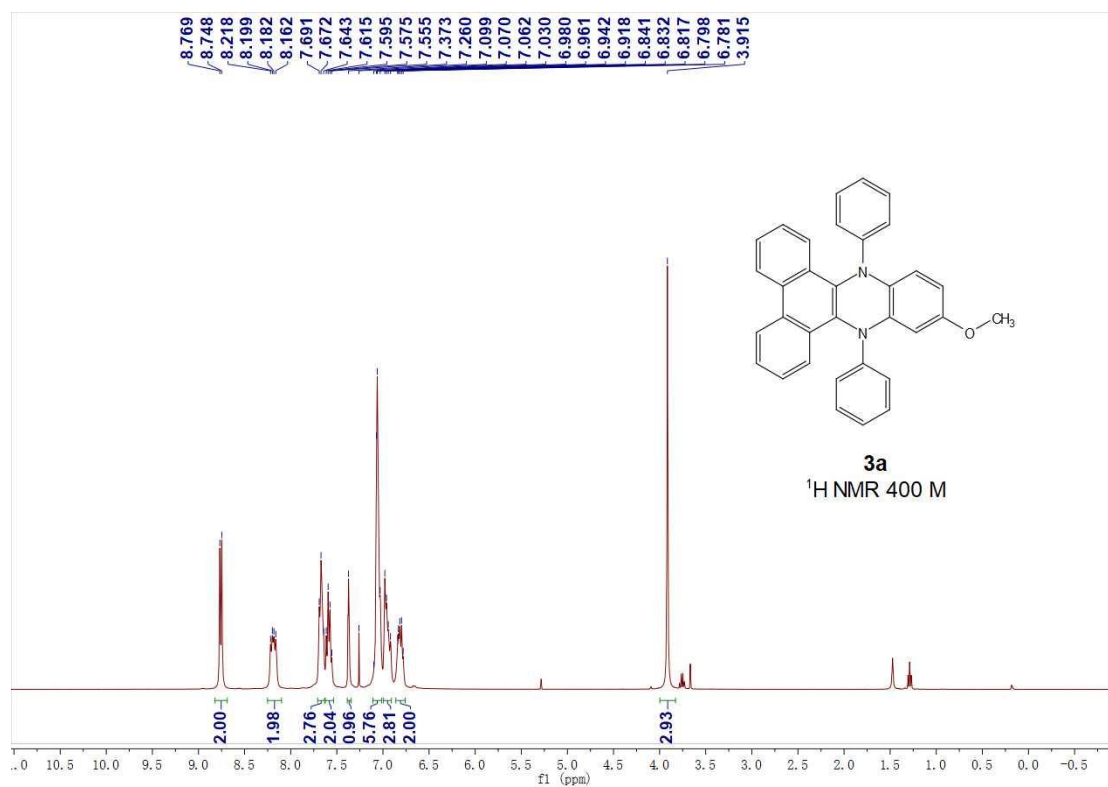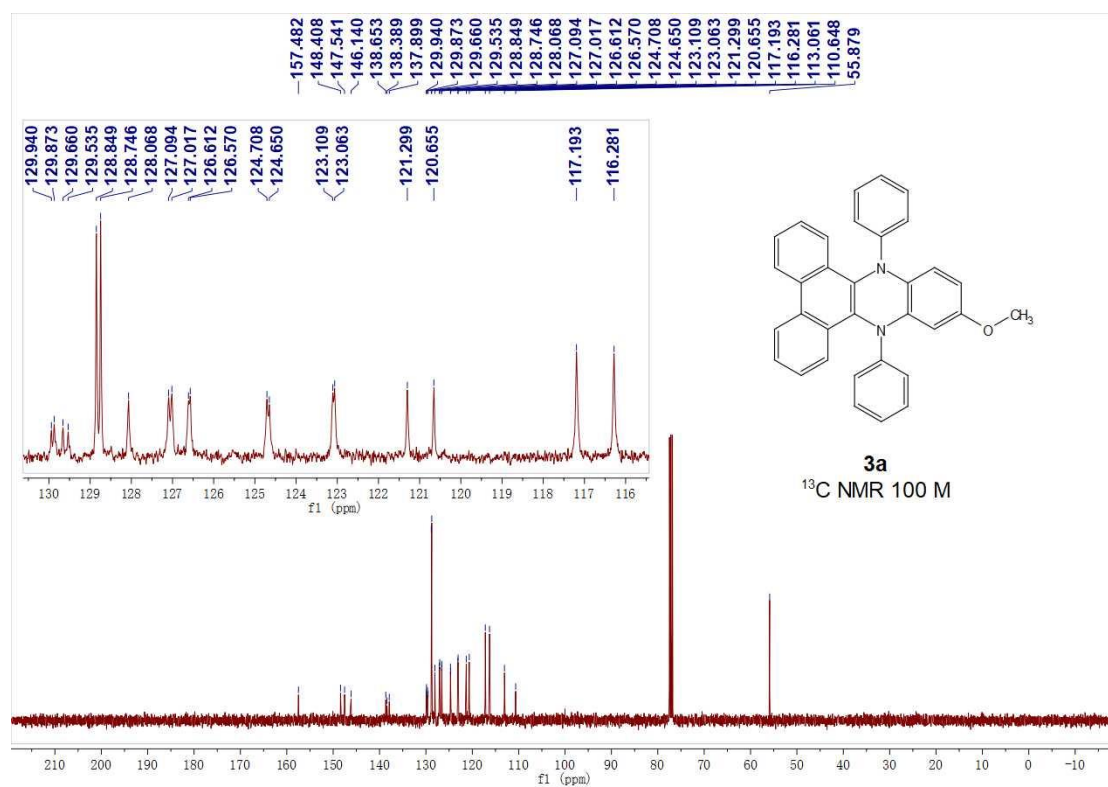

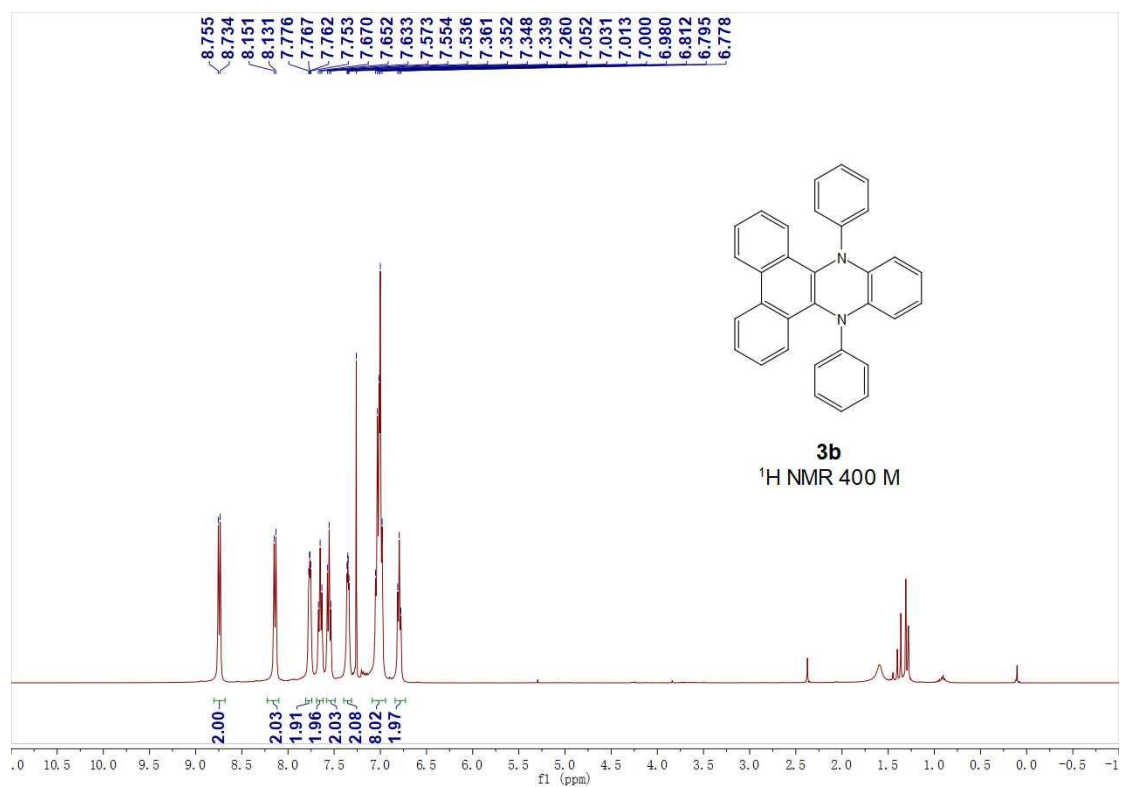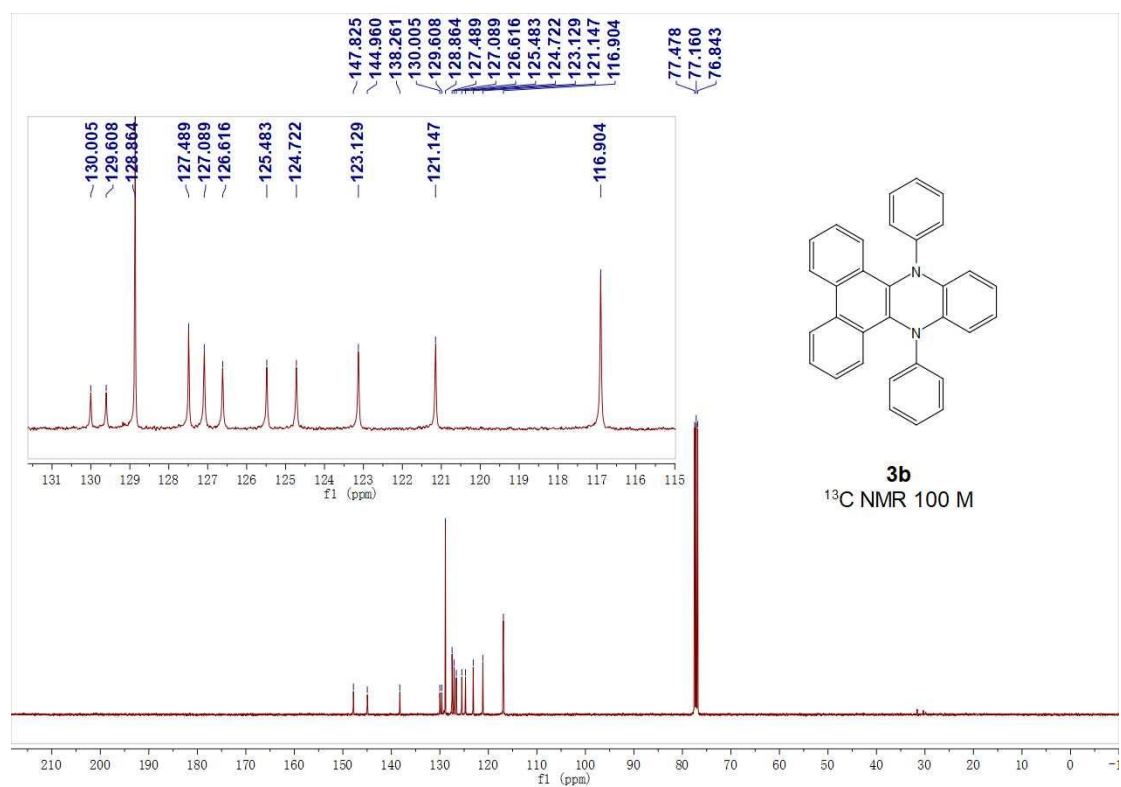



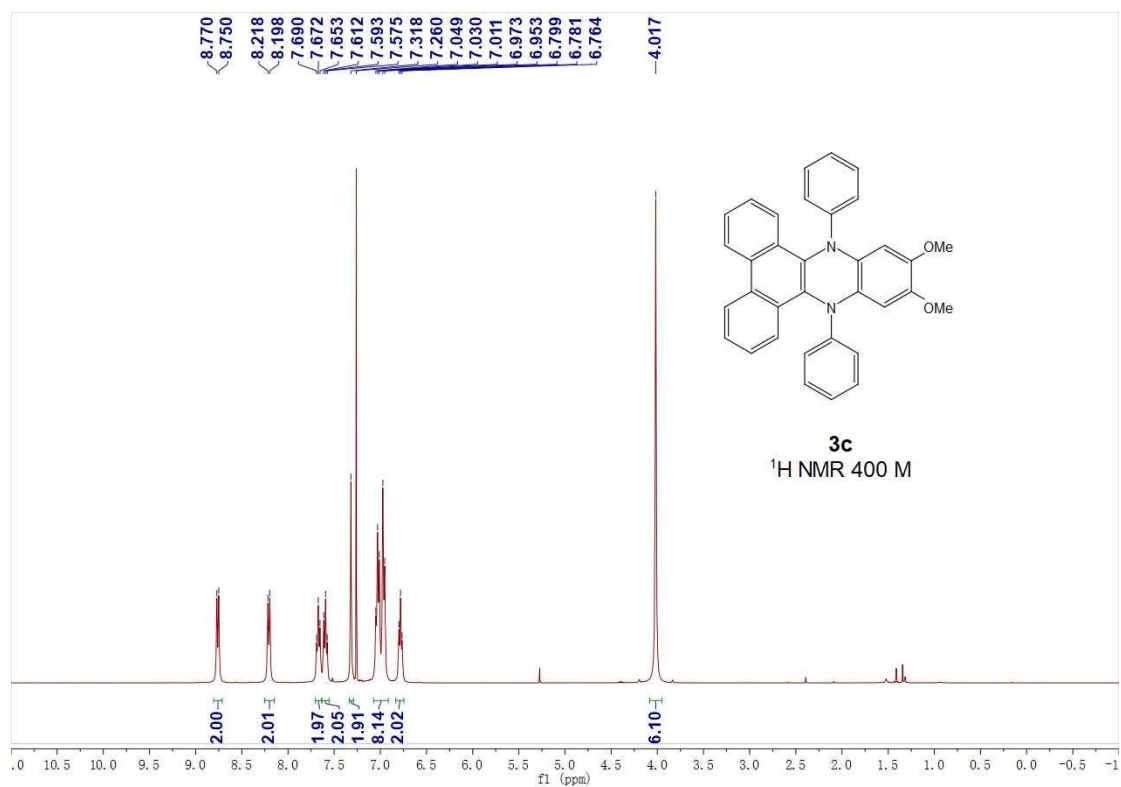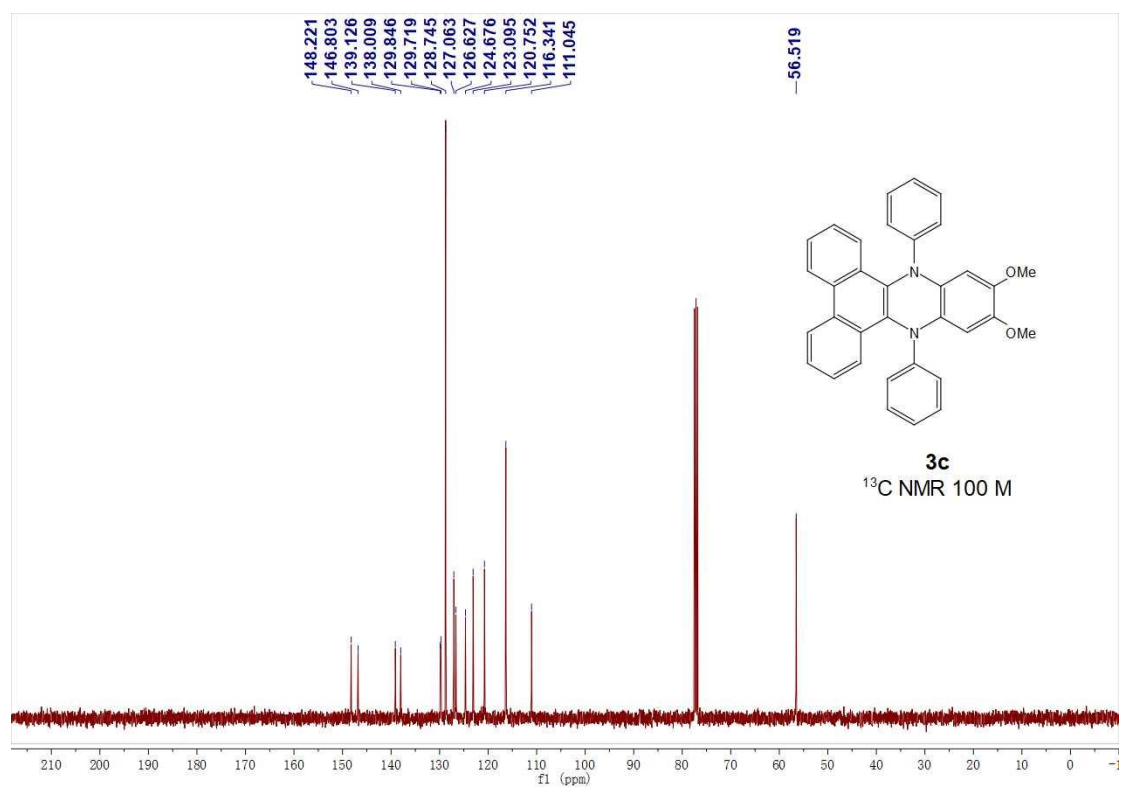

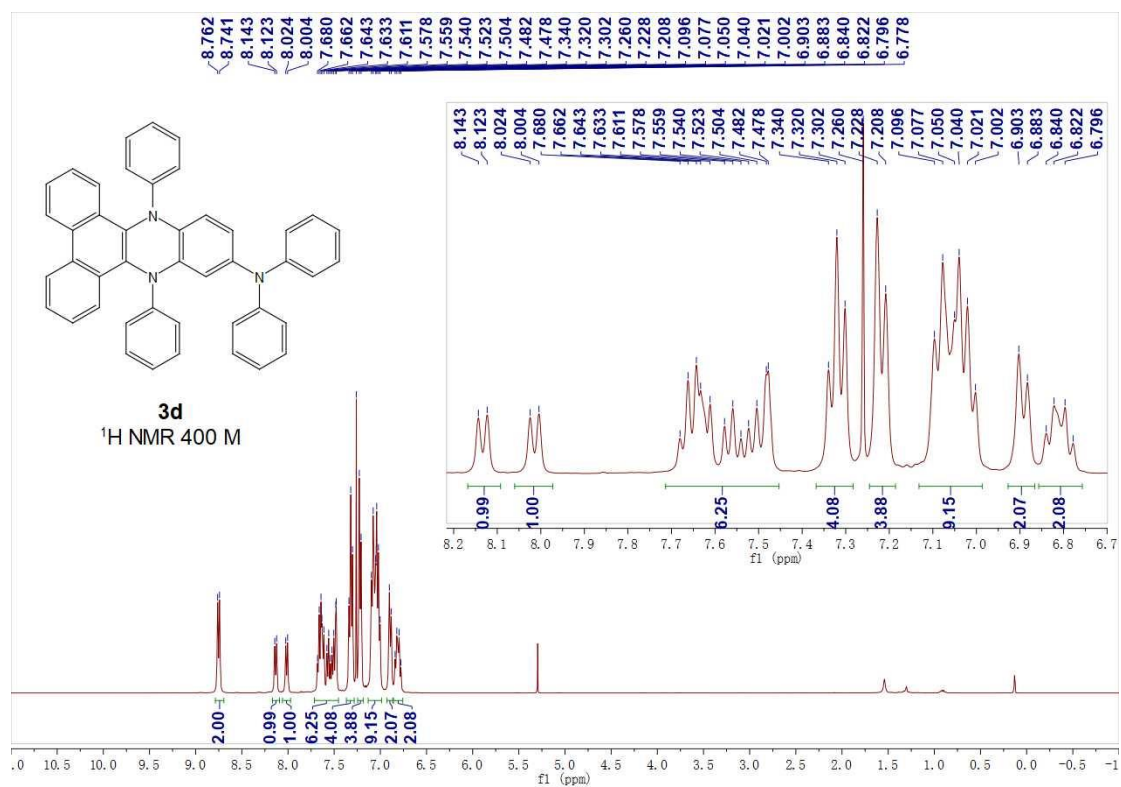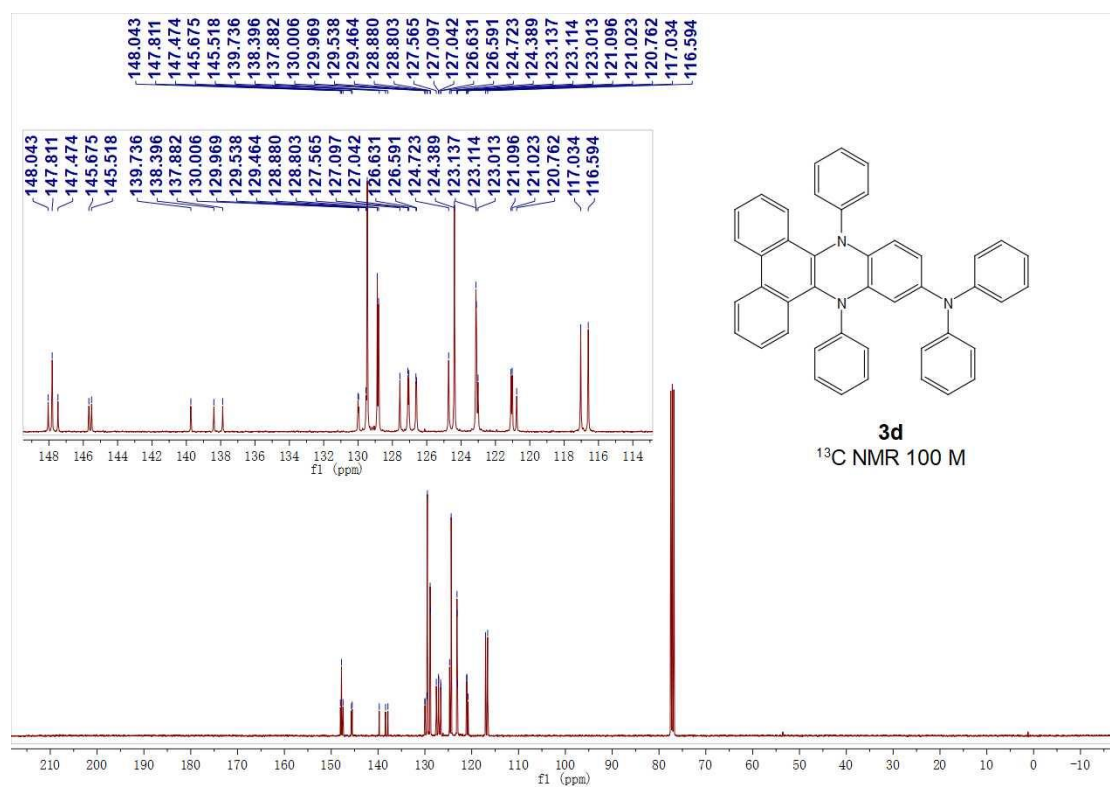

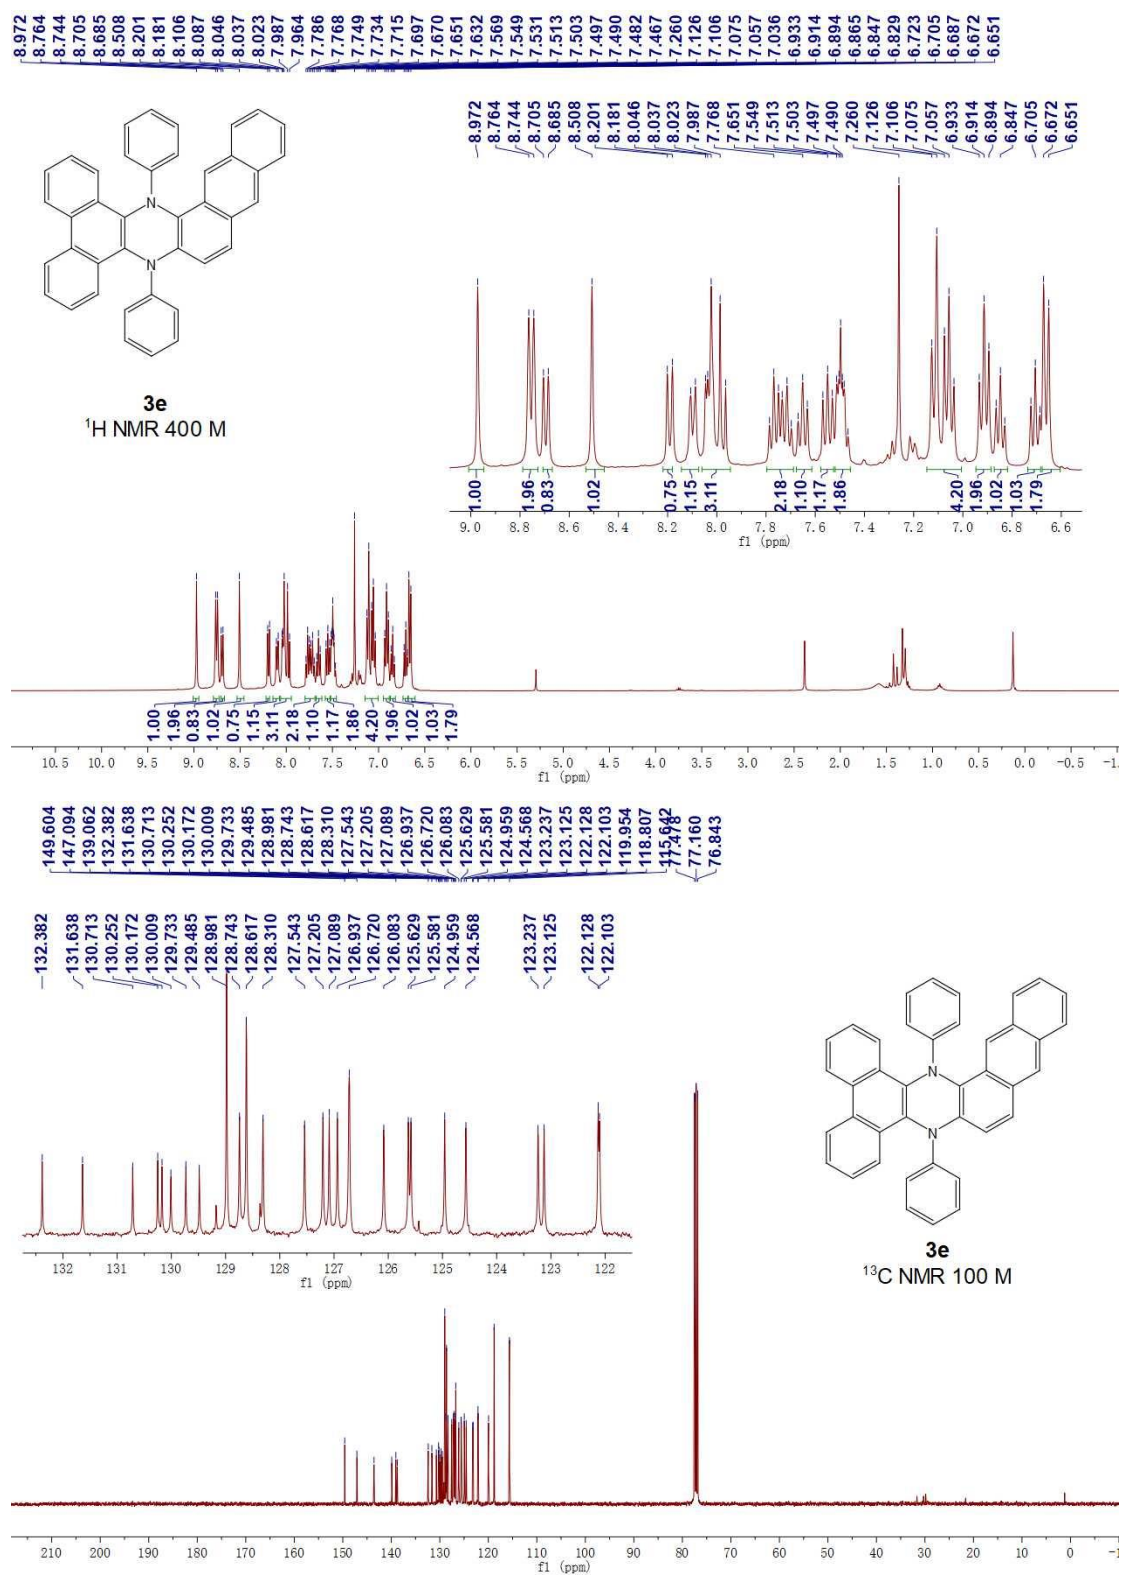



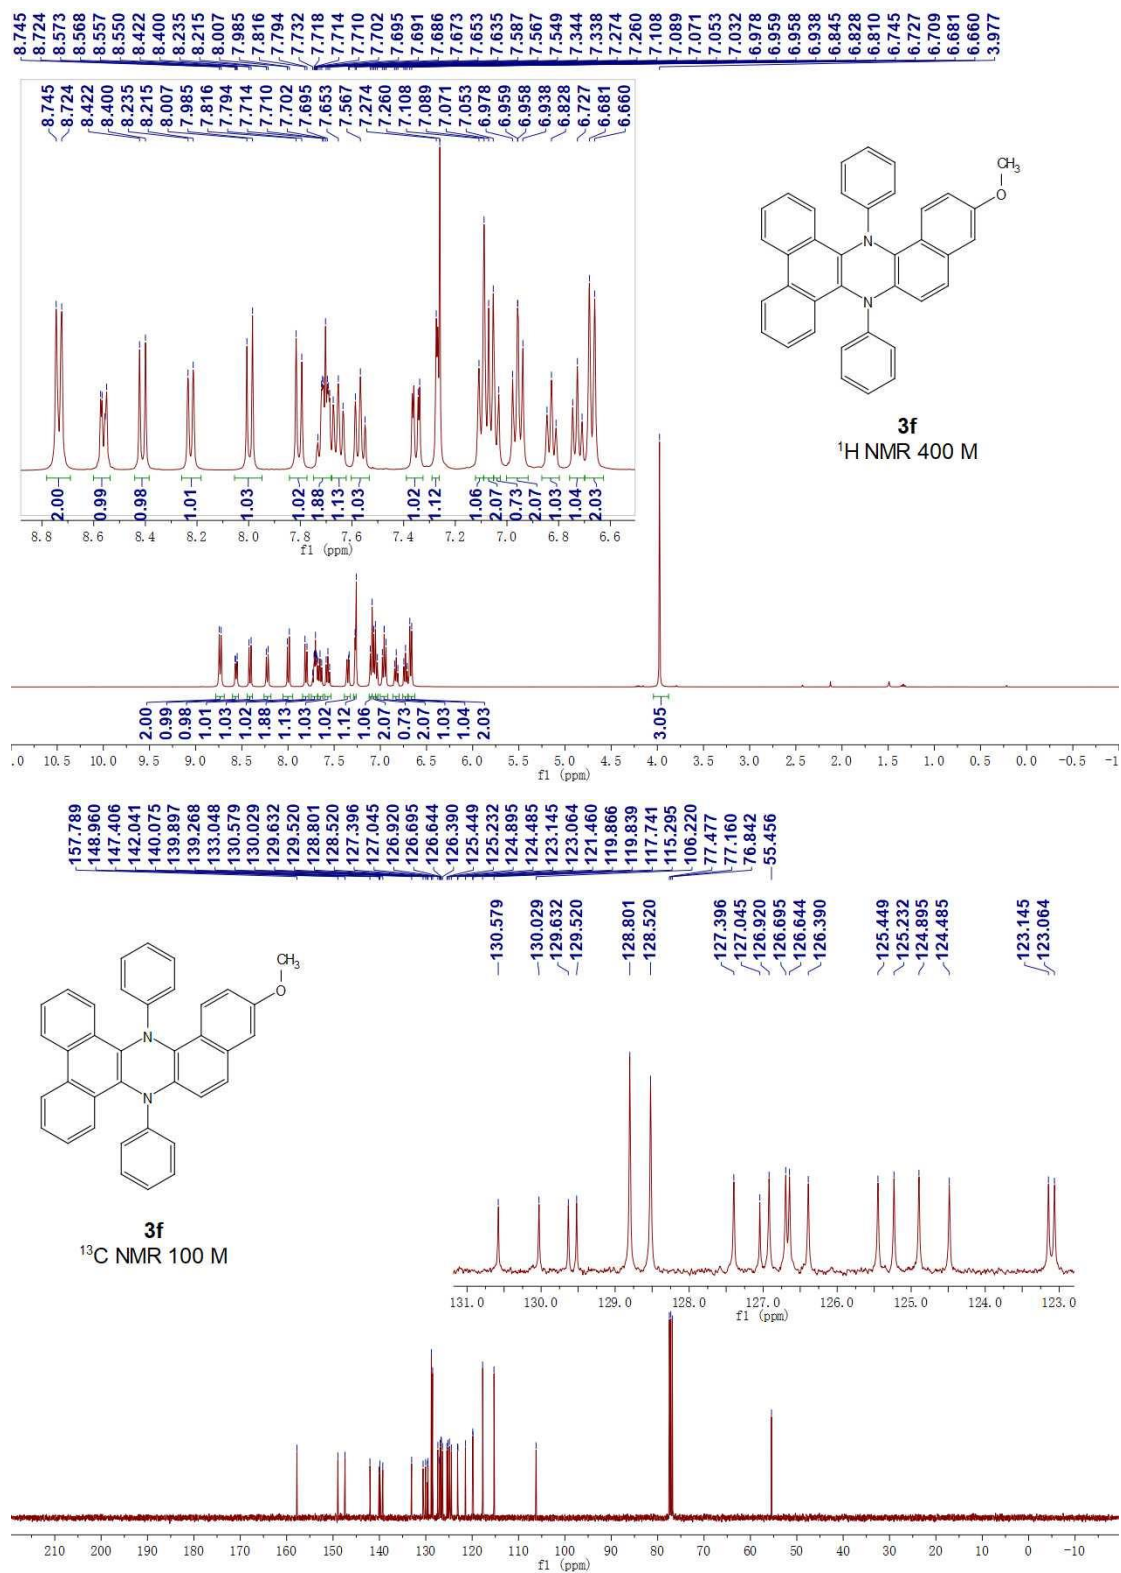

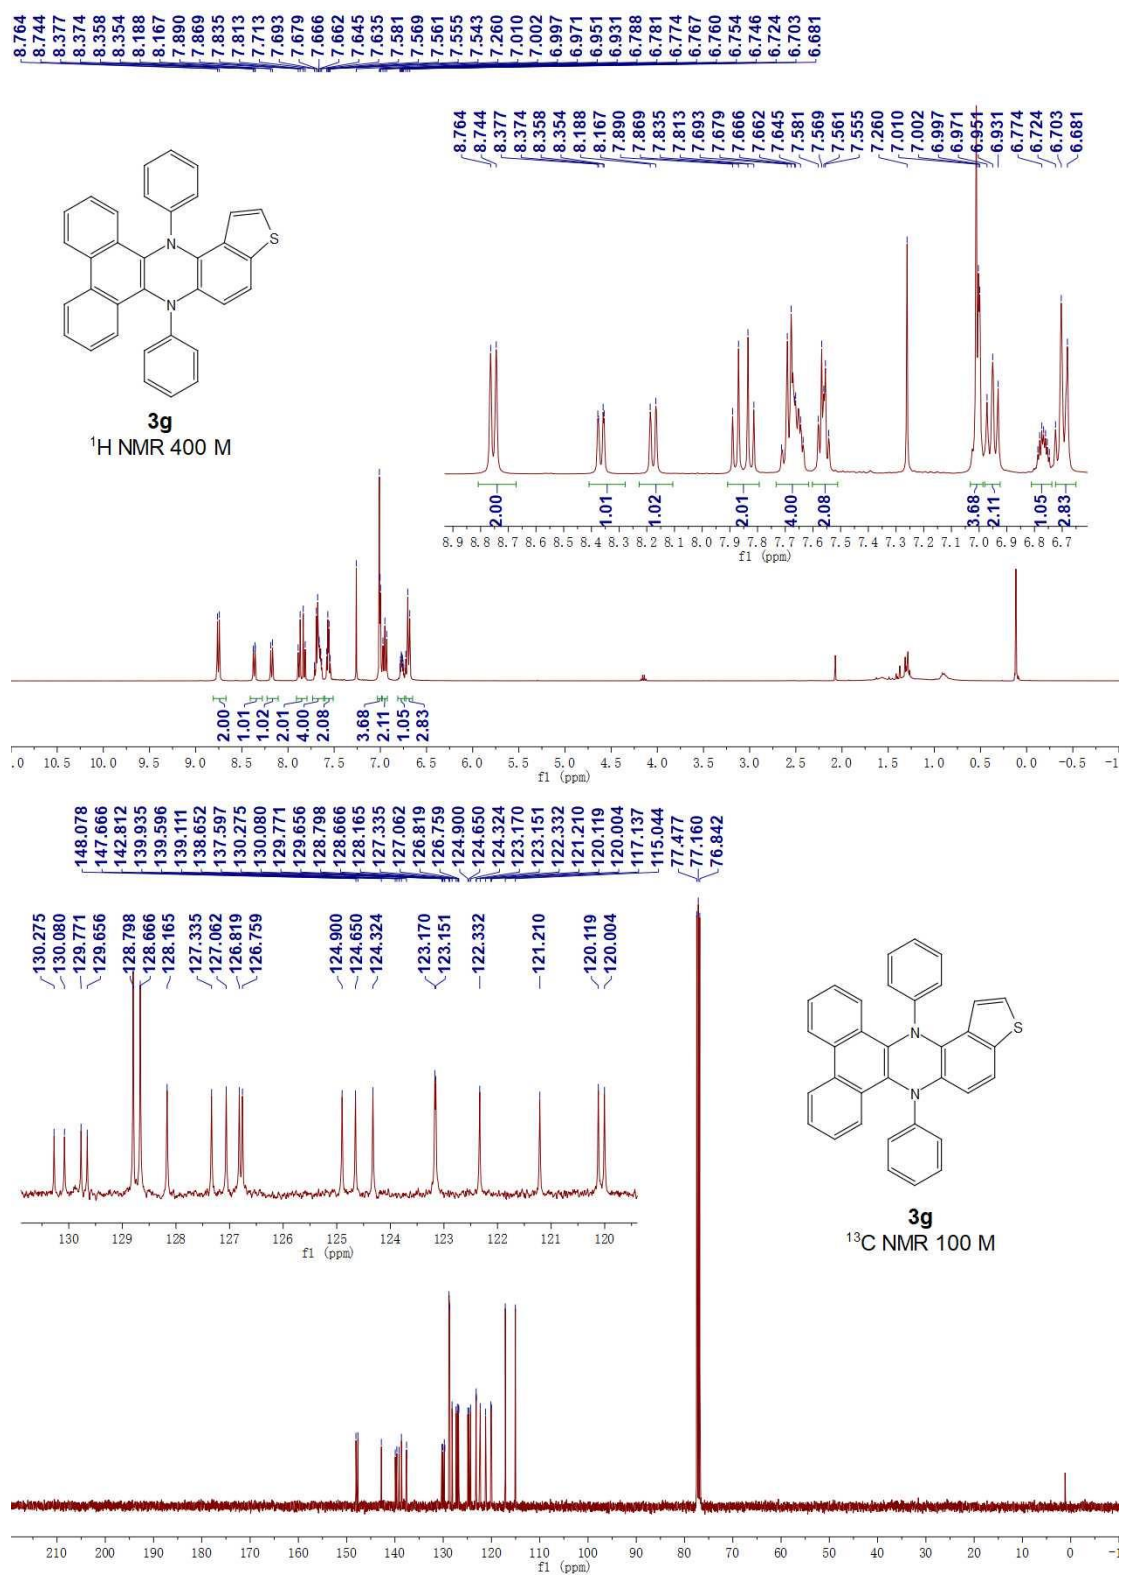

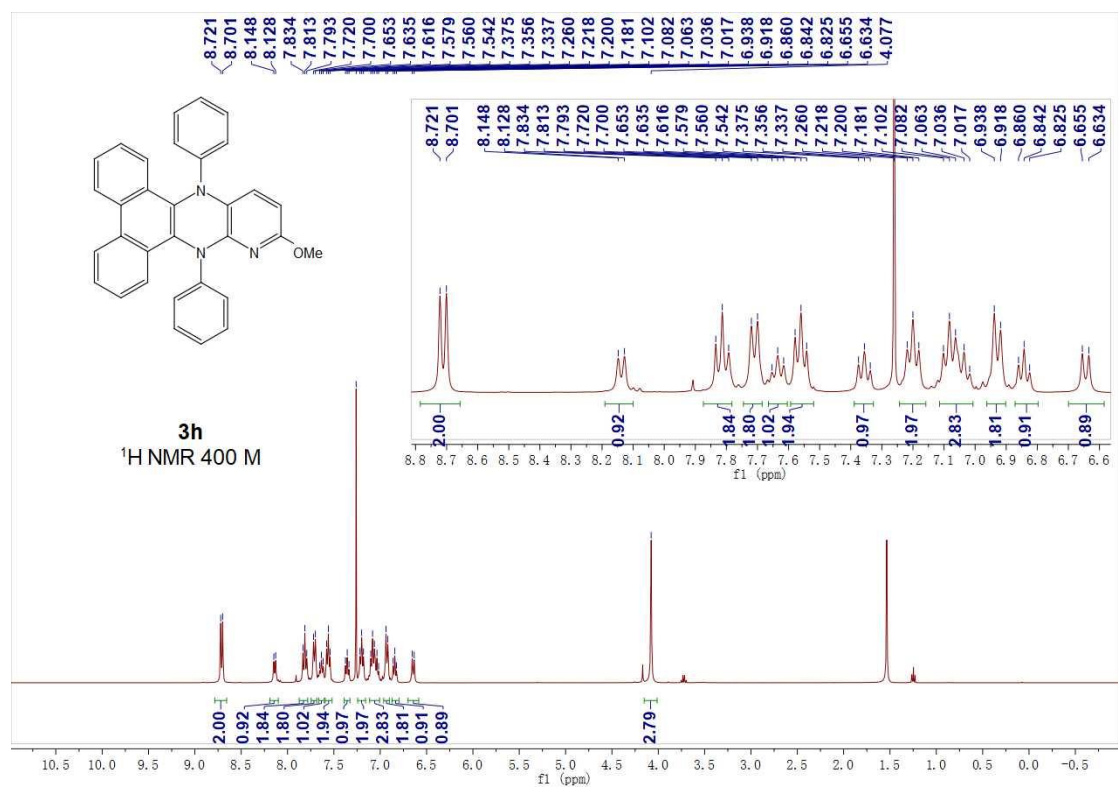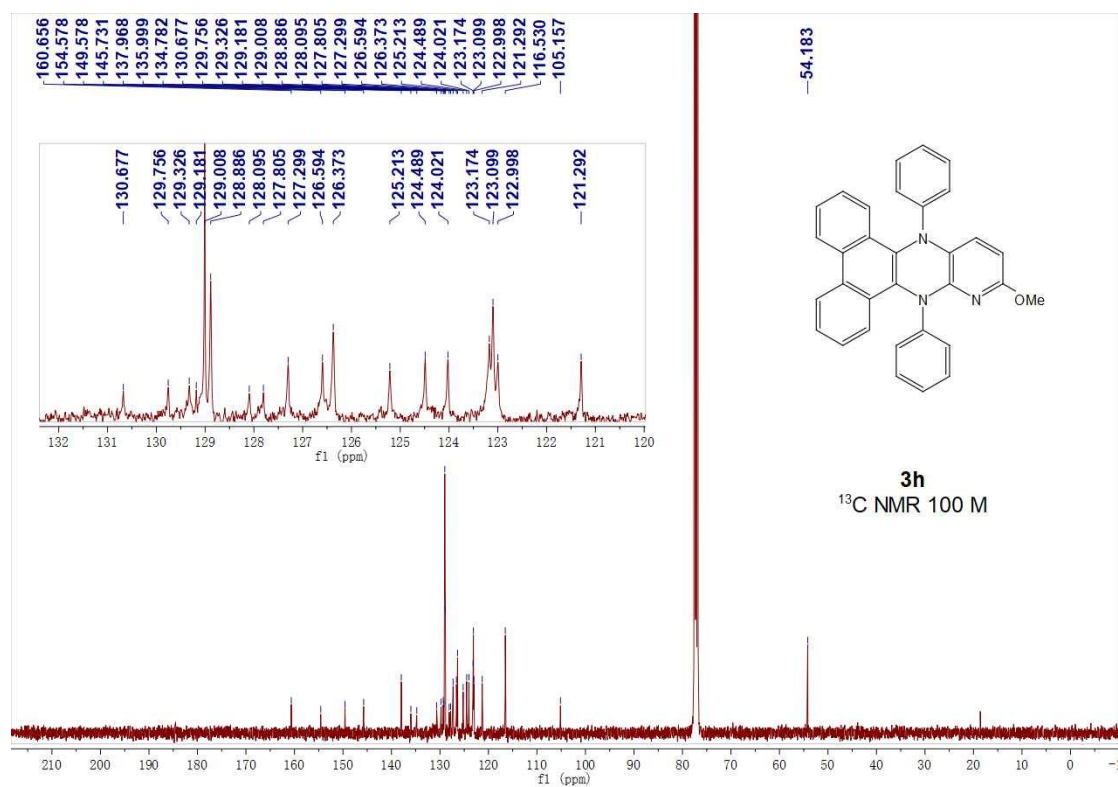





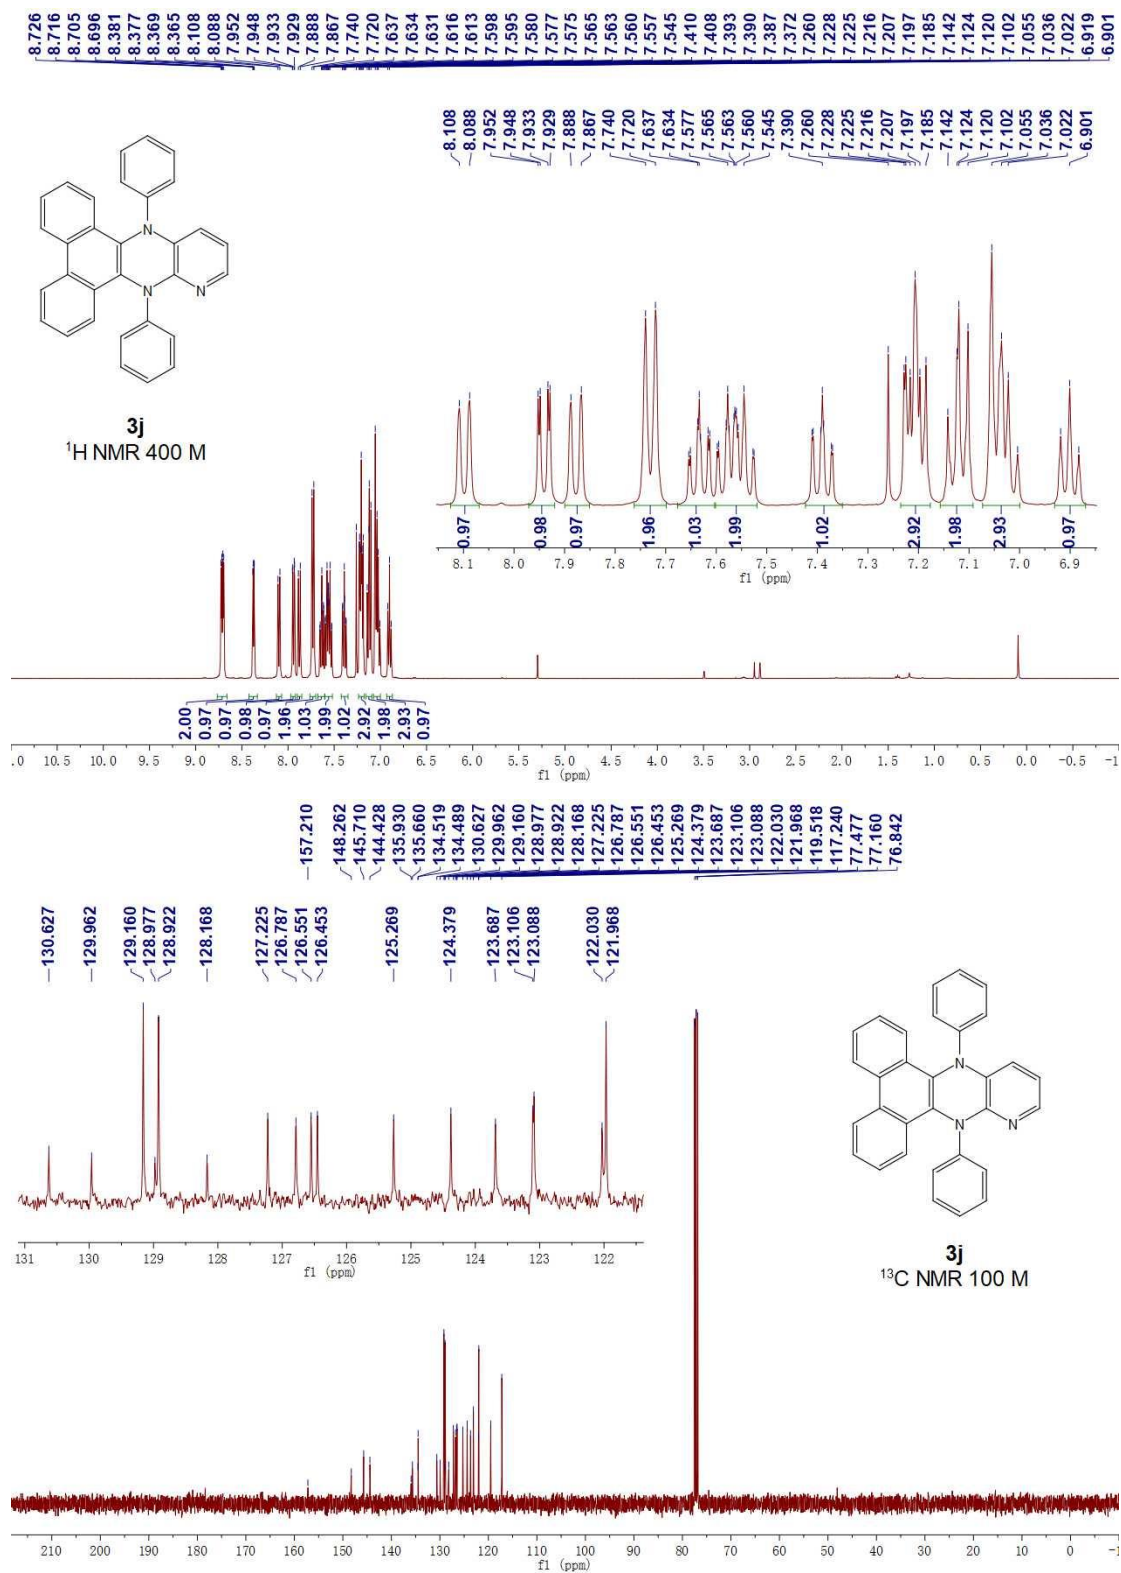

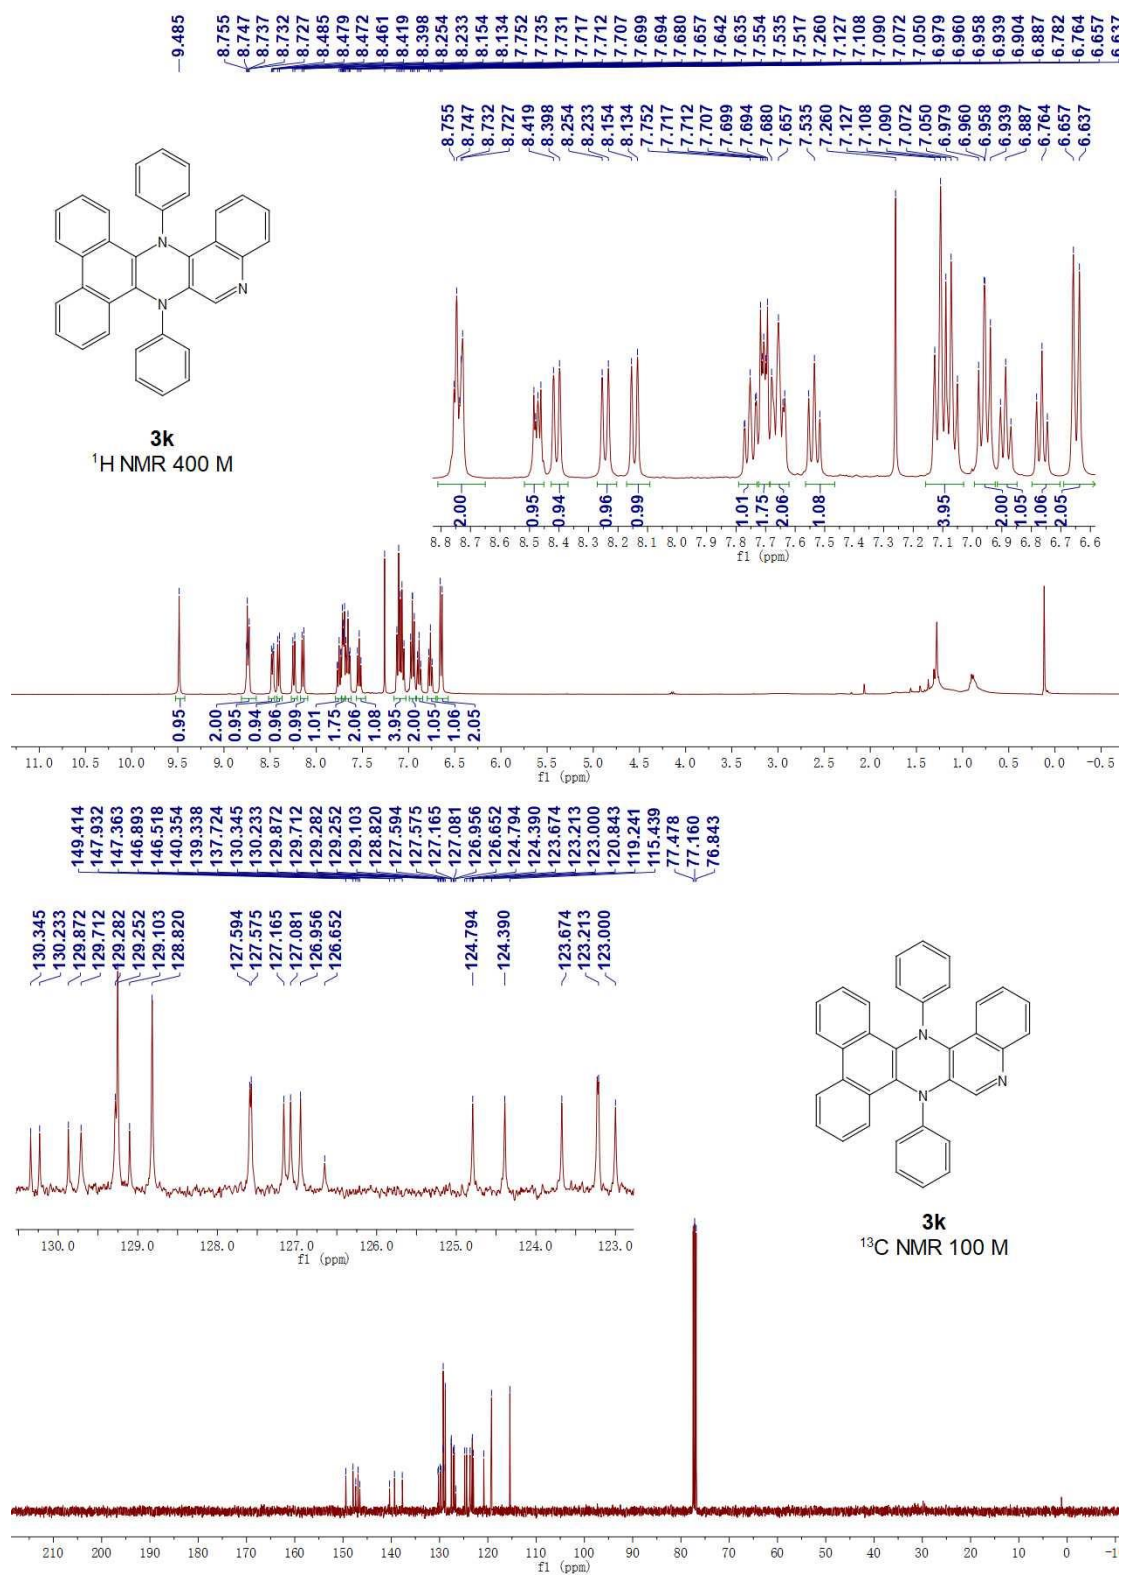

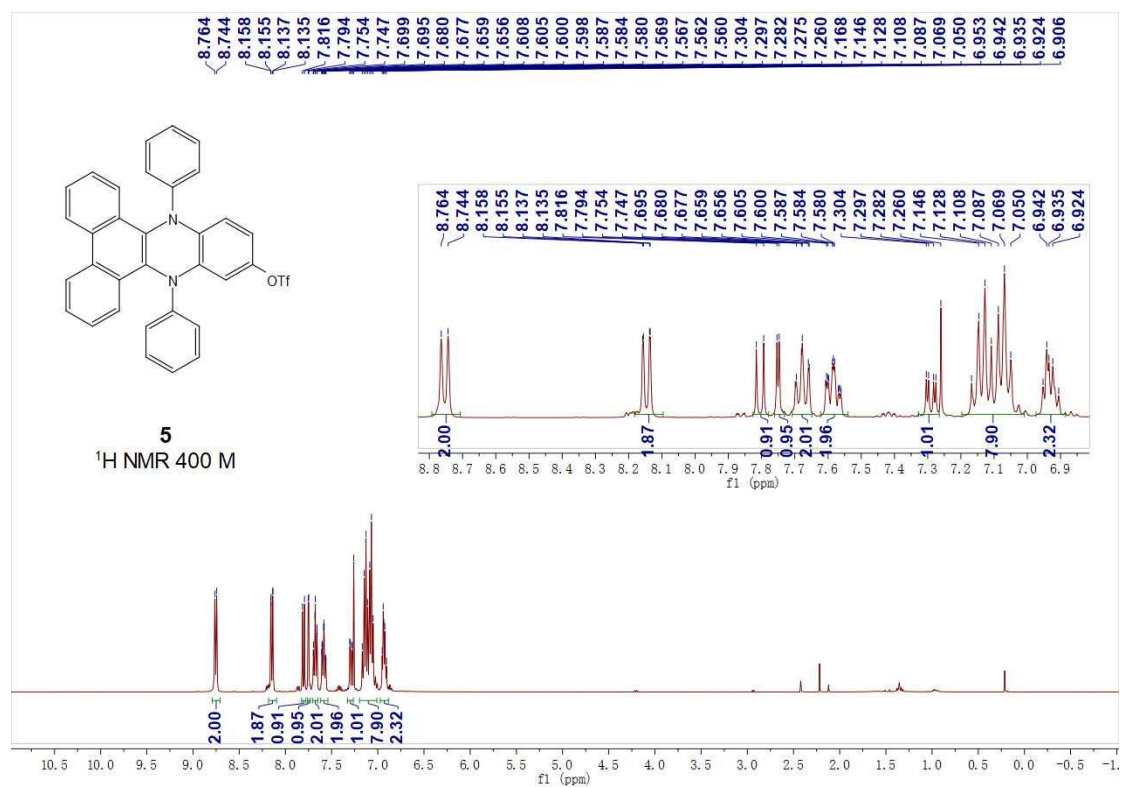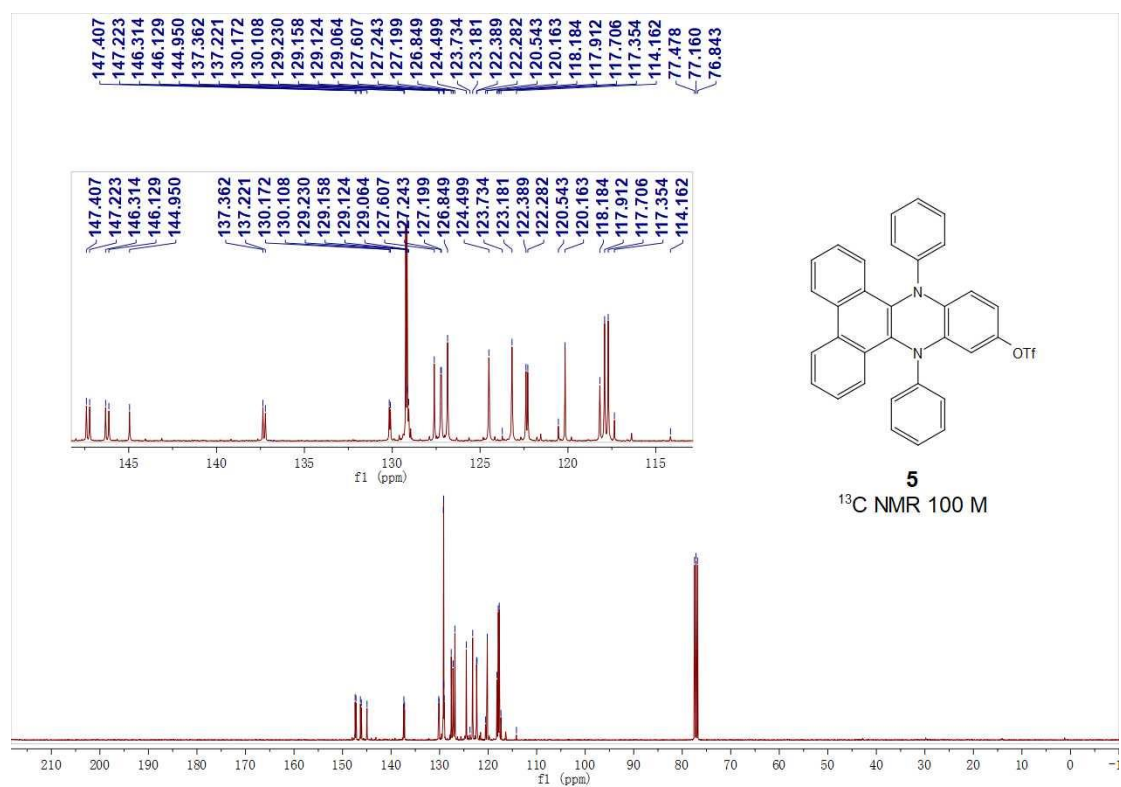

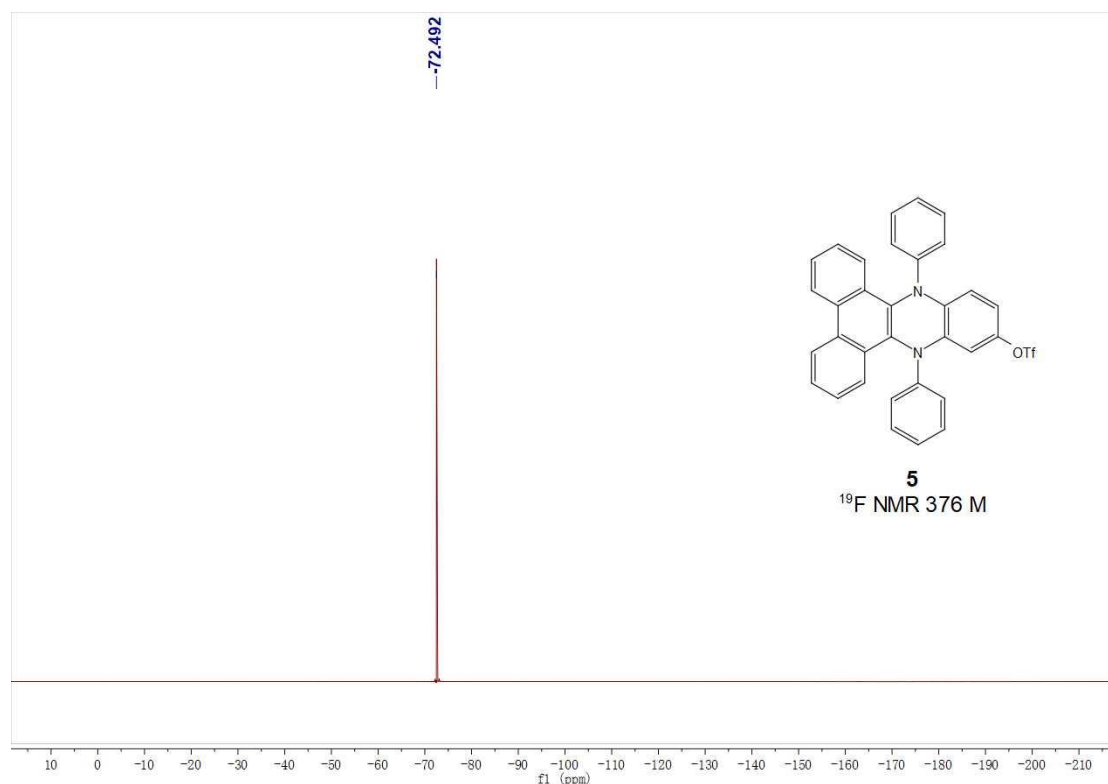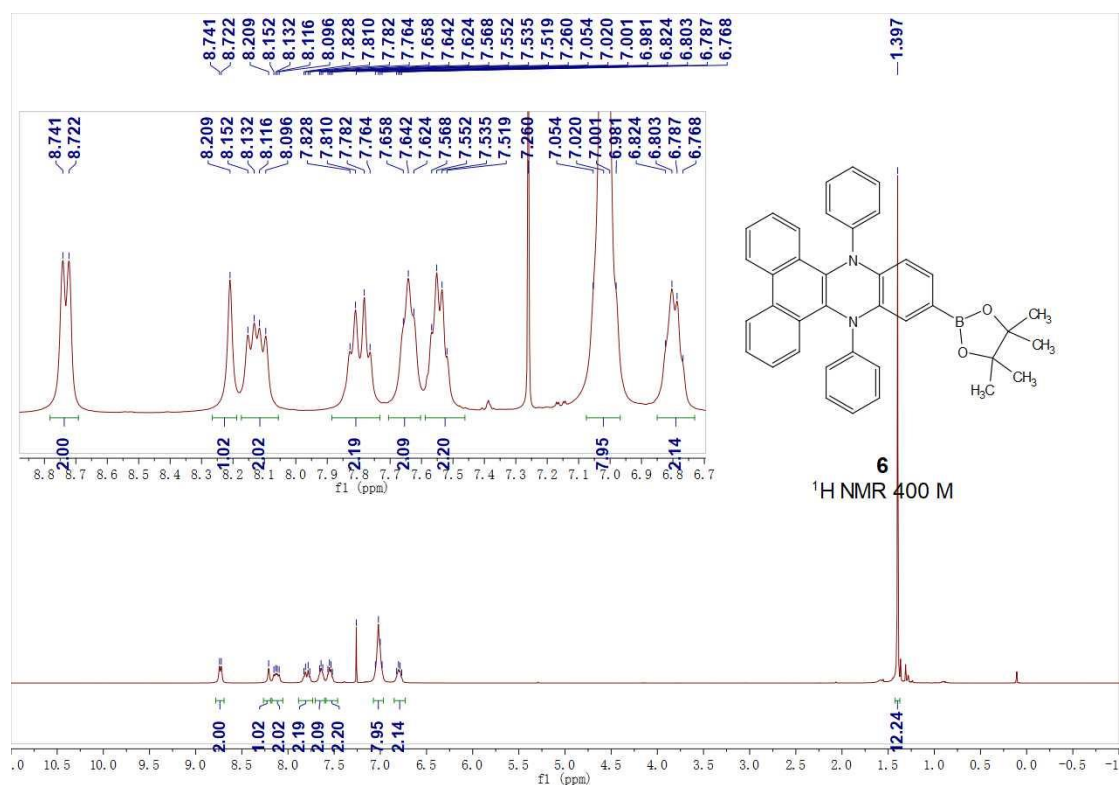





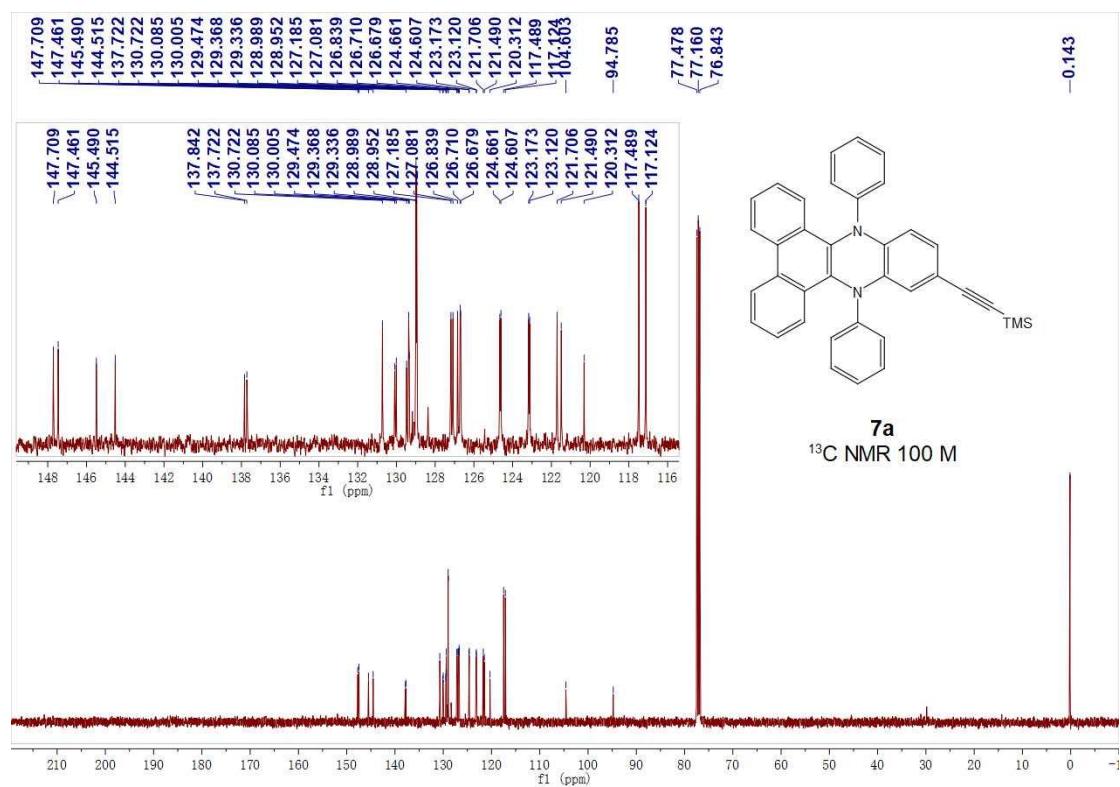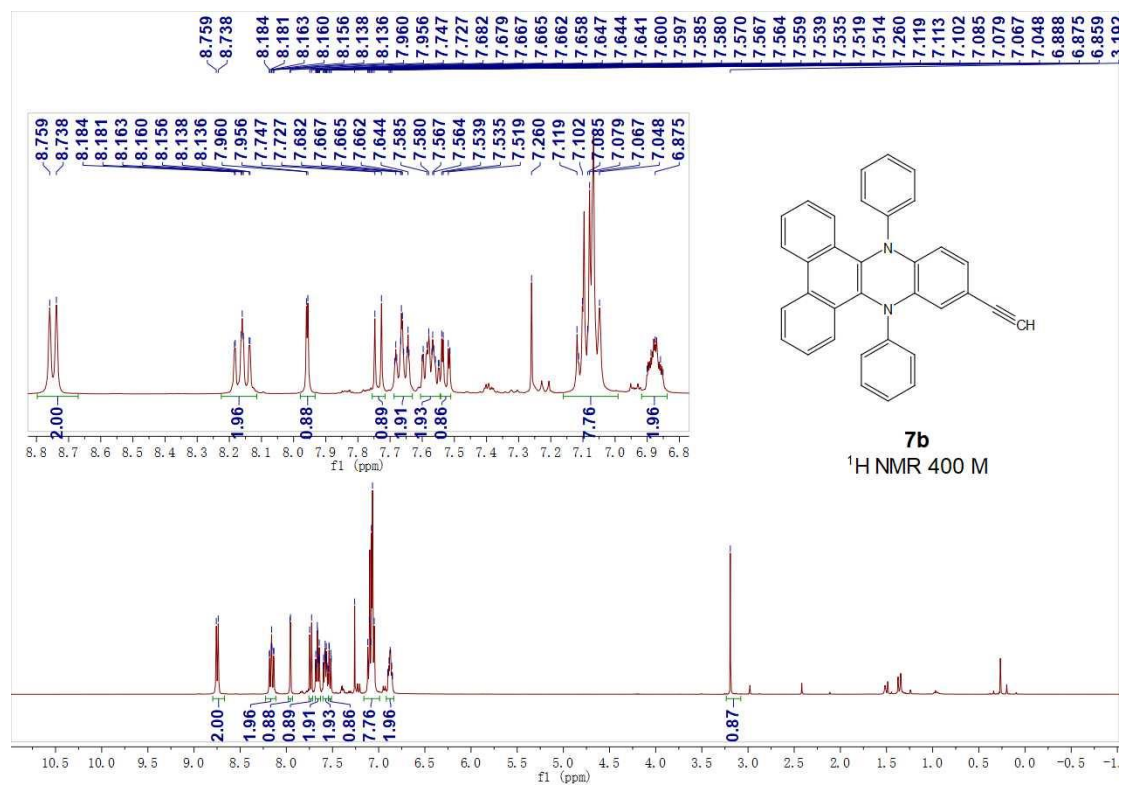

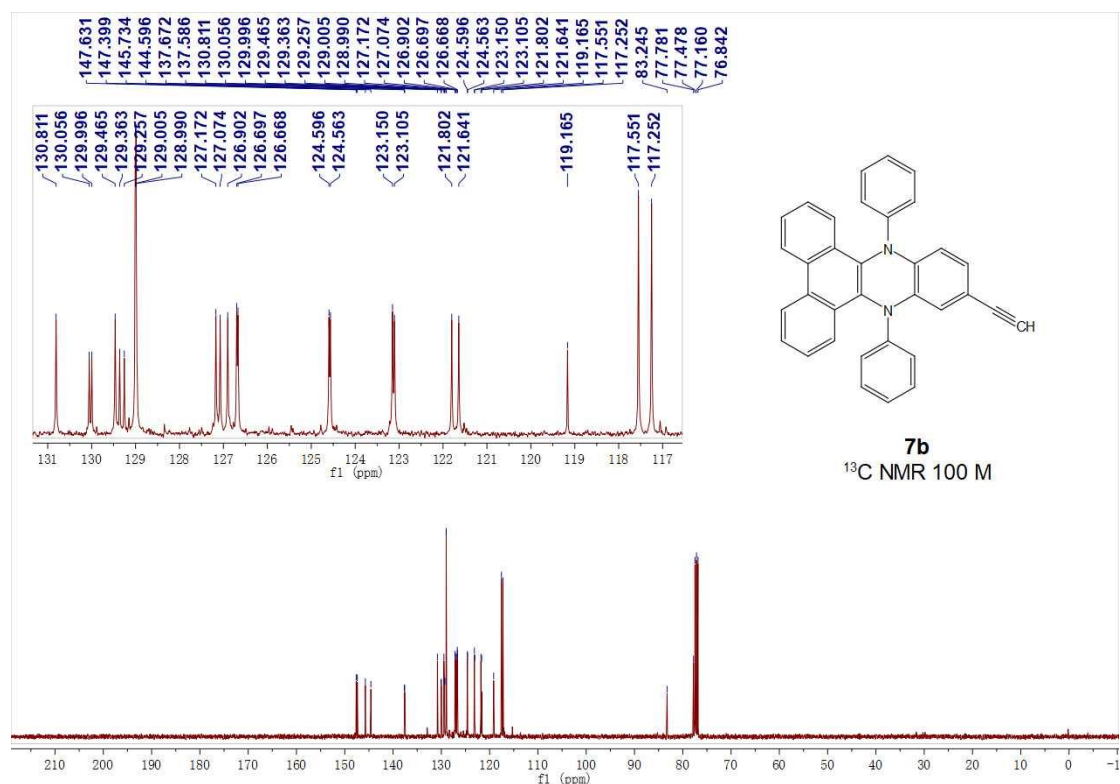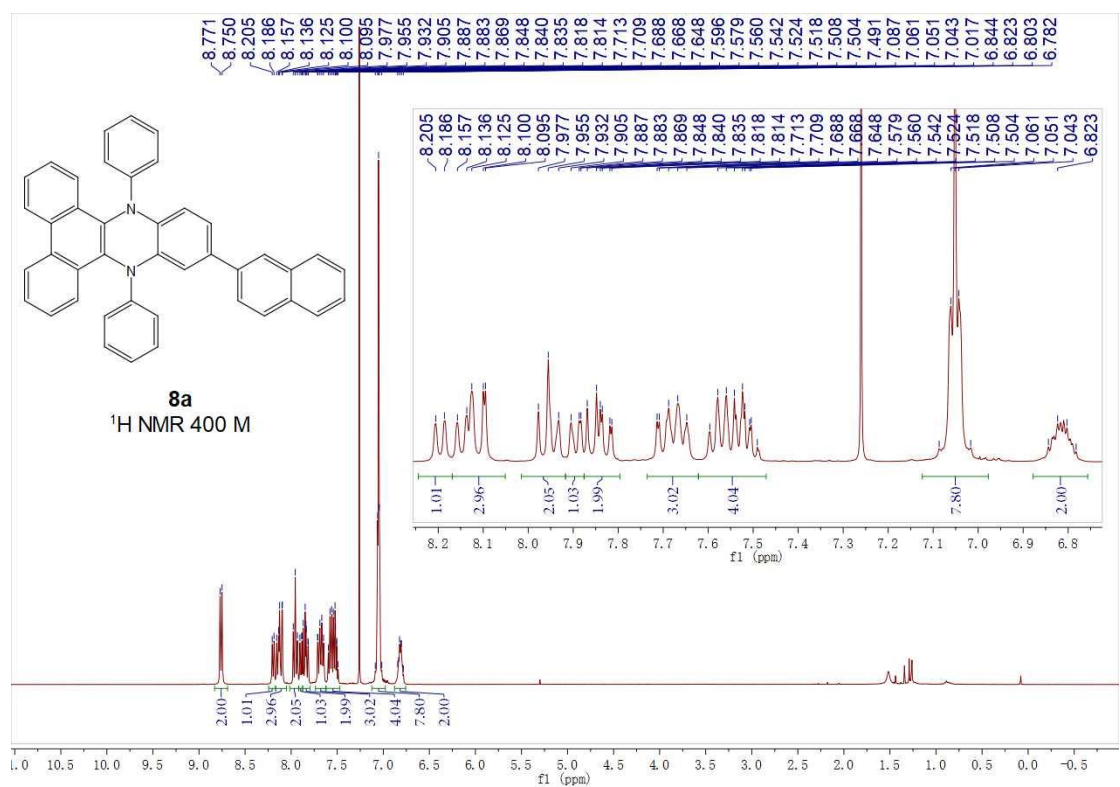

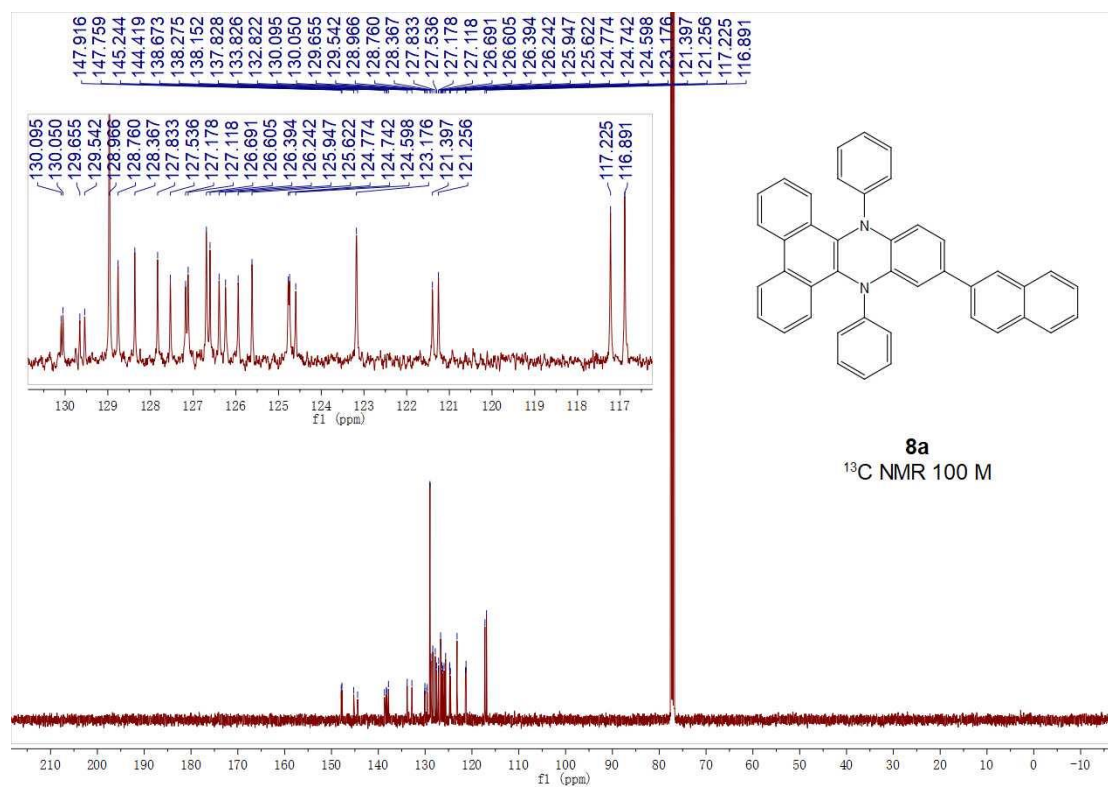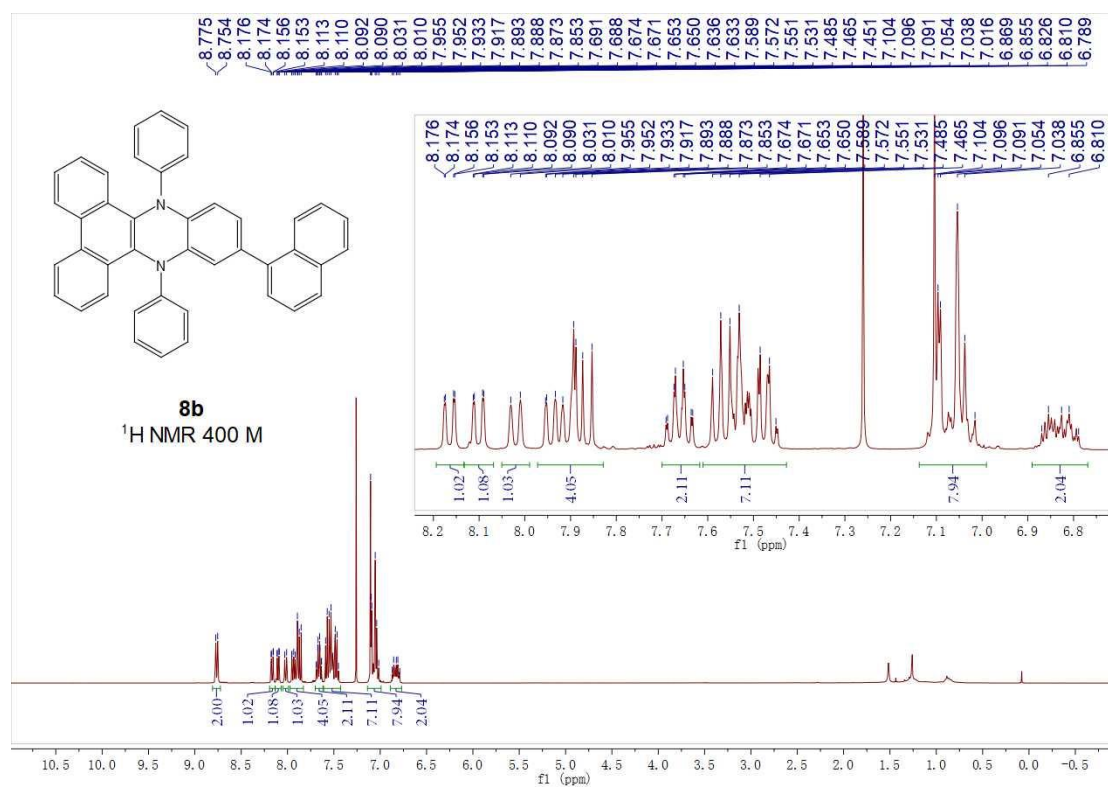

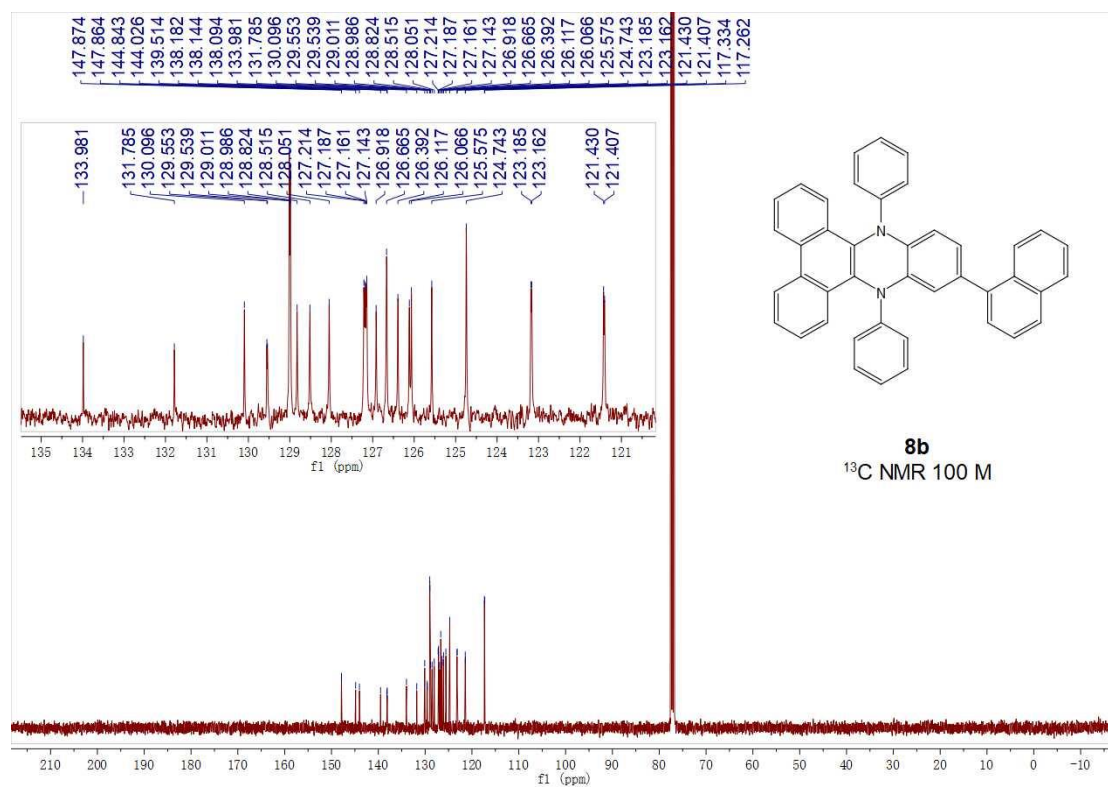

Supplement: c9cc09997b1.pdf [file c9cc09997b1.pdf]
